# Supplementary material for: Sensory experience inversely regulates feedforward and feedback excitation-inhibition ratio in rodent visual cortex
Source: eLife. 2018 Oct 12;7:e38846. doi: 10.7554/eLife.38846 (PMC6224193; doi:10.7554/eLife.38846)
Supplement: Figure 1—source data 1. [file elife-38846-fig1-data1.xlsx]

## Sheet: Sheet1
Main Figure											Supplemental
1E			1F				1G				1_S1A				1_S1B														1_S1C				1_S1D
Charge I	Charge E		Cell #	E/I CTR V1b	E/I MD V1b		Cell #	E/I CTR V1m	E/I MD V1m		Cell #	E/I CTR Rat	E/I MD Rat		Cell #	Rin CTR	Rin MD		Cp CTR	Cp MD		Rs CTR	Rs MD		Vm CTR	Vm MD		Cell #	pk. latency ACSF	pk. latency TTX+4AP		Cell #	I amp. ACSF	I amp. TTX+4AP
1.36755e-11	1.62051e-12		1	0.12134	0.0688968		1	0.0529608	0.226463		1	0.2238	0.1802		1	5.40006e+08	5.0289e+08		6.20982e-11	7.09599e-11		1.99294e+07	2.36289e+07		0.0564888	0.0663748		1	9.9	9.5		1	1.19635e-09	2.26074e-11
2.41351e-11	3.09322e-12		2	0.102521	0.0773864		2	0.0405298	0.238781		2	0.1311	0.2342		2	4.24029e+08	3.50587e+08		5.60547e-11	8.36264e-11		2.19061e+07	1.8376e+07		0.0551888	0.0412212		2	10	10		2	1.11812e-09	1.16751e-11
2.34264e-11	2.57309e-12		3	0.11435	0.121172		3	0.0699696	0.108085		3	0.1192	0.2827		3	3.42974e+08	3.37644e+08		8.54117e-11	6.52665e-11		1.8283e+07	2.00154e+07		0.0461438	0.0225566		3	9.9	9.7		3	1.6446e-09	9.8942e-12
2.3629e-11	2.64733e-12		4	0.068867	0.101484		4	0.0771401	0.152172		4	0.108	0.1546		4	4.73612e+08	7.84004e+08		7.27924e-11	5.70986e-11		2.30542e+07	2.21217e+07		0.0574242	0.0481569		4	9.1	9.7
3.11177e-11	2.94643e-12		5	0.169576	0.126128		5	0.106029	0.157185		5	0.1747	0.2141		5	3.39592e+08	5.60497e+08		6.63162e-11	6.18899e-11		2.19734e+07	2.25766e+07		0.0648413	0.0477054		5	10.2	10
3.11433e-11	3.5532e-12		6	0.0672902	0.129438		6	0.131967	0.162428		6	0.2573	0.1901		6	7.29842e+08	5.7154e+08		7.45901e-11	7.59101e-11		1.90496e+07	2.05078e+07		0.05246	0.0554294		6	11.2	11.6
2.9816e-11	3.60262e-12		7	0.0979036	0.0481062		7	0.0800044	0.101444		7	0.1851	0.3755		7	4.01706e+08	5.71121e+08		7.89194e-11	9.15193e-11		1.88146e+07	1.93112e+07		0.0437565	0.0506751		7	10.7	10.8
3.23716e-11	4.24625e-12		8	0.104615	0.0902282		8	0.113784	0.143772		8	0.1404	0.2077		8	4.33328e+08	6.90231e+08		6.03984e-11	5.17844e-11		2.11263e+07	2.40954e+07		0.0353738	0.0392614		8	11.3	11
			9	0.118844	0.145099		9	0.147501	0.155513		9	0.1836	0.182		9	2.34882e+08	5.97065e+08		8.36889e-11	6.60495e-11		1.85292e+07	2.25839e+07		0.012464	0.040089		9	10.5	11.8
			10	0.125639	0.0939138		10	0.115814	0.115292		10		0.1723		10	5.64553e+08	3.71229e+08		7.28009e-11	1.00969e-10		1.86662e+07	1.65751e+07		0.0396417	0.0427562		10	12	11.6
			11	0.0760376	0.125965		11	0.163995	0.0633617		11		0.2718		11	4.64457e+08	4.197e+08		5.55117e-11	6.38406e-11		2.29326e+07	2.23376e+07		0.0305937	0.0418384
			12	0.0968895	0.0444109		12	0.0983443			12		0.3454		12	3.80777e+08			1.0885e-10			1.9426e+07			0.0514685
			13	0.10546	0.0959142		13	0.0570511			13		0.5235		13	4.75679e+08			7.78538e-11			2.05561e+07			0.0351028
			14	0.111482	0.0795268		14	0.0611127							14	5.29071e+08			5.20902e-11			2.32896e+07			0.0334074
			15		0.0677714
			16		0.0928856
			17		0.113344
			18		0.0761736
			19		0.157289
			20		0.123327
			21		0.167646
			22		0.098281
			23		0.107805
			24		0.170054
			25		0.100966
			26		0.105486
			27		0.151206
			28		0.137854
			29		0.109388
			30		0.122094
