# Supplementary material for: Sensory experience inversely regulates feedforward and feedback excitation-inhibition ratio in rodent visual cortex
Source: eLife. 2018 Oct 12;7:e38846. doi: 10.7554/eLife.38846 (PMC6224193; doi:10.7554/eLife.38846)
Supplement: Figure 2—source data 1. [file elife-38846-fig2-data1.xlsx]

## Sheet: Sheet1
Figure 2 Main Figure															Supplemental
2C				2D								2D			2_S1A				2_S1B				2_S1C				2_S1D
Cell #	Evoked Amp. CTR	Evoked Amp. MD		Cell #	Rin CTR	Rin MD		Vm CTR	Vm MD		Time (ms)	WAVG CTR	WAVG MD		Cell #	Frq. BL	Frq. Stim.			Rel. Frq. Spont.	Rel. Frq. Evoked		Time (ms)	WAVG Spont.	WAVG Evoked		Cell #	Spont. Amp. CTR	Spont. Amp. MD
1	12.2938	10.1481		1	1.42984e+08	1.54966e+08		0.0641922	0.0714001		0	0.000596549	0.0117606		1	14.75	55		5	0.00915632	0.00803222		0	0.000317548	0.00516753		1	12.2938	10.1481
2	7.73807	9.15275		2	8.52596e+07	1.99491e+08		0.0707502	0.0703219		0.2	0.000451732	-0.0100598		2	11.6667	44.3333		5.1	0.0112934	0.00867194		0.2	0.000759223	-0.0048932		2	7.73807	9.15275
3	9.99248	9.06201		3	8.21025e+08	1.82425e+08		0.0697288	0.0690475		0.4	0.00525691	0.00362076		3	15.375	37.6667		5.2	0.0116402	0.0108452		0.4	-0.00997526	0.00397243		3	9.99248	9.06201
4	9.30043	7.96616		4	8.28039e+07	1.72106e+08		0.0686854	0.066157		0.6	-0.00400715	-0.00888742		4	12.9167	60.5		5.3	0.0149894	0.0110953		0.6	-0.0106216	-0.00677622		4	9.30043	7.96616
5	12.5117	9.65279		5	1.98253e+08	2.17607e+08		0.0700057	0.0636297		0.8	-0.00427989	-0.00674692		5	13.5	61		5.4	0.0163887	0.0104532		0.8	0.00774059	-0.00594499		5	12.5117	9.65279
6	9.23647	8.87788		6	1.37519e+08	1.24795e+08		0.0792471	0.0771363		1	-0.0222283	-0.0453897		6	6.25	45.6667		5.5	0.0230815	0.0137416		1	-0.00335428	-0.0333614		6	9.23647	8.87788
7	11.0427	10.7013		7	1.51599e+08	6.02598e+07		0.0768955	0.0709495		1.2	-0.0872256	-0.179732		7	13.25	51.5		5.6	0.0148129	0.0125648		1.2	-0.0815702	-0.130085		7	11.0427	10.7013
8	8.22611	10.5549		8	1.39952e+08	2.0585e+08		0.0708131	0.0726561		1.4	-0.274209	-0.471438		8	11.25	59.5		5.7	0.0152735	0.010309		1.4	-0.304268	-0.364986		8	8.22611	10.5549
9	12.0195	9.74967		9	1.20578e+08	1.70532e+08		0.0680432	0.0729528		1.6	-0.599417	-0.751601		9	12.5	62		5.8	0.0219372	0.0127492		1.6	-0.643048	-0.669605		9	12.0195	9.74967
10	9.54681	8.84855		10	1.10812e+08	2.03044e+08		0.0687123	0.0644322		1.8	-0.853446	-0.932066		10	9.0833	46.3333		5.9	0.0177793	0.011452		1.8	-0.882582	-0.889995		10	9.54681	8.84855
11	11.5259	9.44524		11	1.71666e+08	1.77947e+08		0.0797942	0.0634565		2	-0.962278	-1		11	11.5	38.6667		6	0.0146703	0.0153895		2	-0.996453	-0.980123		11	11.5259	9.44524
12	14.7356	10.0142		12	2.08065e+08	1.47132e+08		0.0712307	0.0673876		2.2	-1	-0.998709		12	17.75	53		6.1	0.0201803	0.0140554		2.2	-1	-1		12	14.7356	10.0142
13	10.0559	9.16627		13	1.09761e+08	1.63477e+08		0.0708907	0.066558		2.4	-0.987736	-0.938576		13	11.0833	41.3333		6.2	0.0138202	0.0157261		2.4	-0.943396	-0.965837		13	10.0559	9.16627
14	10.0593	10.2926		14	1.63167e+08	1.60341e+08		0.0767838	0.0738527		2.6	-0.924374	-0.889683		14	9.4167	37		6.3	0.0169604	0.012832		2.6	-0.887656	-0.909091		14	10.0593	10.2926
15	9.07195	9.42916		15	2.17526e+08	1.06004e+08		0.0608094	0.067875		2.8	-0.844299	-0.856232		15	7.25	41.6667		6.4	0.0167434	0.0139978		2.8	-0.833039	-0.85034		15	9.07195	9.42916
16	10.2088	10.4984		16	1.58709e+08	7.6529e+07		0.0691286	0.078614		3	-0.823386	-0.794839		16	12.8333	31		6.5	0.0172179	0.0143015		3	-0.780691	-0.810908		16	10.2088	10.4984
17	10.1908	9.59904		17	1.49617e+08	1.48892e+08		0.070434	0.0704101		3.2	-0.786313	-0.772688		17	7.5833	50.8		6.6	0.0141763	0.0140059		3.2	-0.739695	-0.780659		17	10.1908	9.59904
18	10.6936	11.7978		18	1.24177e+08	2.11695e+08		0.0737336	0.0689039		3.4	-0.726063	-0.72639		18	3.65	38.75		6.7	0.0176316	0.0164923		3.4	-0.695125	-0.726788		18	10.6936	11.7978
19	13.3451	10.2643		19	1.57067e+08	1.56481e+08		0.0713439	0.072465		3.6	-0.691597	-0.666195		19	10.625	56		6.8	0.0148623	0.01723		3.6	-0.649496	-0.68055		19	13.3451	10.2643
20	12.663			20	4.96085e+07			0.0698667			3.8	-0.653821	-0.608106		20	3.3125	57.6667		6.9	0.0165097	0.0164018		3.8	-0.607076	-0.63348		20	12.663
21	10.6963			21	1.25824e+08			0.0705344			4	-0.614712	-0.581922						7	0.0118523	0.0140197		4	-0.571586	-0.600281		21	10.6963
22	10.7622			22	1.077e+08			0.0646656			4.2	-0.561429	-0.523093						7.1	0.0186008	0.0119864		4.2	-0.530973	-0.544459		22	10.7622
23	9.80509			23	1.17378e+08			0.076216			4.4	-0.526425	-0.515039						7.2	0.0141313	0.0112422		4.4	-0.491792	-0.521781		23	9.80509
											4.6	-0.500582	-0.489098						7.3	0.0125844	0.0127564		4.6	-0.459917	-0.495892
											4.8	-0.438529	-0.425026						7.4	0.0140156	0.010221		4.8	-0.425541	-0.432912
											5	-0.423098	-0.417217						7.5	0.0132145	0.0136767		5	-0.393436	-0.420967
											5.2	-0.40071	-0.384849						7.6	0.0139578	0.0129906		5.2	-0.370075	-0.394012
											5.4	-0.363224	-0.347797						7.7	0.0130531	0.0118975		5.4	-0.335849	-0.356722
											5.6	-0.336501	-0.342058						7.8	0.0107046	0.0124774		5.6	-0.316559	-0.339598
											5.8	-0.312331	-0.313397						7.9	0.0127041	0.0108157		5.8	-0.296779	-0.313372
											6	-0.290974	-0.265759						8	0.0109934	0.0120316		6	-0.264595	-0.279991
											6.2	-0.257425	-0.251725						8.1	0.0128998	0.0130632		6.2	-0.255759	-0.255368
											6.4	-0.246804	-0.241625						8.2	0.0122237	0.0128361		6.4	-0.23171	-0.244985
											6.6	-0.232553	-0.22768						8.3	0.0124118	0.0116801		6.6	-0.221132	-0.230873
											6.8	-0.215065	-0.2041						8.4	0.0109665	0.0110679		6.8	-0.207986	-0.210597
											7	-0.197602	-0.18509						8.5	0.0110527	0.0112863		7	-0.184625	-0.192425
											7.2	-0.176792	-0.166219						8.6	0.0110986	0.0115994		7.2	-0.171305	-0.172501
											7.4	-0.177208	-0.162786						8.7	0.0115274	0.0108477		7.4	-0.163748	-0.171156
											7.6	-0.139977	-0.157991						8.8	0.00936601	0.0117451		7.6	-0.151825	-0.148762
											7.8	-0.143941	-0.155578						8.9	0.0103592	0.00991933		7.8	-0.141204	-0.149809
											8	-0.141241	-0.127948						9	0.0099946	0.00970593		8	-0.136283	-0.135703
											8.2	-0.127154	-0.124722						9.1	0.00995445	0.00809727		8.2	-0.121494	-0.126585
											8.4	-0.113979	-0.127668						9.2	0.0097816	0.0100983		8.4	-0.103005	-0.120784
											8.6	-0.105861	-0.0920532						9.3	0.00882832	0.0097448		8.6	-0.1065	-0.100087
											8.8	-0.106567	-0.136742						9.4	0.0068964	0.0100676		8.8	-0.0997909	-0.120913
											9	-0.100652	-0.0908892						9.5	0.0083635	0.00896889		9	-0.0879965	-0.0967274
											9.2	-0.0852683	-0.0875326						9.6	0.00741854	0.0100676		9.2	-0.0945704	-0.0868451
											9.4	-0.0810675	-0.05822						9.7	0.00996456	0.0107708		9.4	-0.0728544	-0.0711562
											9.6	-0.0571362	-0.0697						9.8	0.00914626	0.00915561		9.6	-0.0692607	-0.0634231
											9.8	-0.0766894	-0.0632841						9.9	0.0086587	0.00867607		9.8	-0.0680834	-0.0710973
											10	-0.0631422	-0.0583023						10	0.00868977	0.00917438		10	-0.0592475	-0.0614678
											10.2	-0.0587836	-0.0493332						10.1	0.0097072	0.0096513		10.2	-0.0527878	-0.0549998
											10.4	-0.0462578	-0.063705						10.2	0.00797583	0.00875332		10.4	-0.0477222	-0.0547782
											10.6	-0.0506675	-0.0365733						10.3	0.0075902	0.0077223		10.6	-0.0500426	-0.0447589
											10.8	-0.0458658	-0.0337822						10.4	0.00934645	0.00868247		10.8	-0.0426874	-0.0408767
											11	-0.0447913	-0.050747						10.5	0.00571485	0.00692022		11	-0.0403466	-0.0480546
											11.2	-0.0399752	-0.042147						10.6	0.0057734	0.00822799		11.2	-0.0432529	-0.0415072
											11.4	-0.042398	-0.0499626						10.7	0.00645053	0.00696852		11.4	-0.0353941	-0.0463972
											11.6	-0.0154679	-0.0483584						10.8	0.00751612	0.00829798		11.6	-0.0251069	-0.0310514
											11.8	-0.0353923	-0.0661634						10.9	0.00625101	0.00815813		11.8	-0.0245941	-0.0500074
											12	-0.0236198	-0.0412194						11	0.00792449	0.00813143		12	-0.0305239	-0.0322087
											12.2	-0.0113685	-0.0358419						11.1	0.00826699	0.00636554		12.2	-0.01693	-0.0231012
											12.4	-0.0282794	-0.0353255						11.2	0.00647838	0.00625048		12.4	-0.0250057	-0.0320406
											12.6	-0.00477663	-0.0257321						11.3	0.00712882	0.00508407		12.6	-0.0128462	-0.0148996
											12.8	-0.0168082	-0.00574496						11.4	0.00528851	0.00690785		12.8	-0.0110681	-0.0122843
											13	-0.0185016	-0.0190259						11.5	0.00683029	0.00694273		13	-0.0181264	-0.0192787
											13.2	-0.00100954	-0.0274287						11.6	0.00524381	0.00751238		13.2	-0.011303	-0.0136318
											13.4	-0.00305027	-0.0124646						11.7	0.00520203	0.00539192		13.4	-0.015203	-0.00789349
											13.6	-0.00676129	-0.0193777						11.8	0.00467723	0.00553445		13.6	-0.011223	-0.0130695
											13.8	-0.00112126	-0.00119344						11.9	0.00533051	0.0060451		13.8	-0.0140813	-0.00169062
											14	-0.0139569	0.0024818						12	0.00548964	0.00578257		14	-0.0141347	-0.00697374
											14.2	-0.00165637	0.0137421						12.1	0.00421788	0.00644333		14.2	-0.00603097	0.0048516
											14.4	-0.0015676	-0.0258693						12.2	0.0048231	0.00519103		14.4	-0.0089568	-0.0132212
											14.6	-0.021938	-0.0266674						12.3	0.00413482	0.00538945		14.6	-0.0130694	-0.024639
											14.8	-0.0041986	-0.00570329						12.4	0.00514112	0.0062704		14.8	-0.0146063	-0.00542345
											15	-0.00465816	0.00229611						12.5	0.00395283	0.00484124		15	-0.0100826	-0.00201333
											15.2	-0.0131584	-0.0173408						12.6	0.00344445	0.00455261		15.2	-0.00627789	-0.0156088
											15.4	-0.00566053	-0.0146424						12.7	0.00504476	0.00486858		15.4	-0.00369759	-0.010306
											15.6	0.00757223	-0.00998257						12.8	0.00460193	0.00470323		15.6	-0.00736742	-0.000994408
											15.8	-0.0109409	-0.00203068						12.9	0.00373626	0.00514109		15.8	-0.00278296	-0.00740163
											16	0.00838188	0.0044301						13	0.00366701	0.00411979		16	-0.00735757	0.00603825
											16.2	-0.0013435	-0.00640673						13.1	0.00401298	0.00444655		16.2	0.000180491	-0.00419612
											16.4	-0.000873487	-0.0133286						13.2	0.00443505	0.00357354		16.4	0.000385657	-0.00710765
											16.6	0.0069341	-0.00816683						13.3	0.00369359	0.00375962		16.6	-0.000813127	-0.000510007
											16.8	0.00639041	-0.00758936						13.4	0.00385923	0.00412501		16.8	0.0036941	-0.00054083
											17	-0.00495783	-0.0171036						13.5	0.00336115	0.00519076		17	0.00313034	-0.0110507
											17.2	-0.00938962	-0.00361611						13.6	0.00366595	0.00425006		17.2	-0.00174074	-0.00728521
											17.4	-0.00183348	-0.00385593						13.7	0.00373586	0.00466302		17.4	0.00199912	-0.00329507
											17.6	-0.00194078	-0.0212988						13.8	0.00309337	0.00397566		17.6	-0.0051947	-0.0113328
											17.8	0.00527469	-0.0036114						13.9	0.0024302	0.00317512		17.8	-0.00110882	0.000673587
											18	-0.00603422	-0.00210756						14	0.00249477	0.00461067		18	0.000592766	-0.0047745
											18.2	0.00927886	-0.0320027						14.1	0.00356698	0.00318916		18.2	0.00938437	-0.0101419
											18.4	-0.00418163	0.00410718						14.2	0.00270388	0.00342268		18.4	0.000249256	-0.000926259
											18.6	-0.00258849	-0.00751312						14.3	0.00345013	0.00372012		18.6	-0.00374742	-0.00537778
											18.8	-0.0167538	-0.0114646						14.4	0.00223117	0.00307094		18.8	0.000688124	-0.0148714
											19	-0.00296395	-0.015516						14.5	0.00273587	0.00449289		19	-0.00402926	-0.00924256
											19.2	-0.000523456	0.00692845						14.6	0.00186036	0.00279958		19.2	-0.00148739	0.00234926
											19.4	0.00342746	0.00777581						14.7	0.00332977	0.00255197		19.4	-0.000704779	0.00488061
											19.6	-0.00842077	0.00788844						14.8	0.00161417	0.00380284		19.6	0.00330118	-0.00149655
											19.8	-0.00706056	0.0177816						14.9	0.00230511	0.00236713		19.8	0.00452717	0.00376728
											20	0.00796397	0.0139813						15	0.0027472	0.00267194		20	5.882e-05	0.0101809
											20.2	-0.00430718	0.0164097						15.1	0.00220352	0.00301555		20.2	0.00570712	0.00463363
											20.4	0.00785919	0.0139945						15.2	0.00330171	0.00232864		20.4	0.0125935	0.0101301
											20.6	0.00491863	0.020753						15.3	0.002863	0.00222432		20.6	0.00699359	0.0116264
											20.8	-0.00520747	-0.00571104						15.4	0.00190126	0.00266637		20.8	0.00477746	-0.0059744
											21	-0.0129522	-0.0124389						15.5	0.00084505	0.00284328		21	-0.00418176	-0.0132544
											21.2	0.00862594	0.00806286						15.6	0.00190001	0.00204216		21.2	-0.00114696	0.00783254
											21.4	0.000364939	-0.0197118						15.7	0.00262792	0.00296829		21.4	-0.000398074	-0.00935579
											21.6	0.00576967	0.0176121						15.8	0.00169897	0.00265495		21.6	0.00766639	0.0106512
											21.8	-0.00723522	0.0200996						15.9	0.00109019	0.00288923		21.8	-0.00207376	0.00473296
											22	-0.00463399	0.0160015						16	0.00166506	0.00192208		22	0.00337069	0.00426958
																			16.1	0.00234109	0.00285712
																			16.2	0.00168425	0.00198477
																			16.3	0.00196229	0.00205229
																			16.4	0.00110117	0.00214791
																			16.5	0.00120098	0.00216162
																			16.6	0.00195642	0.00256613
																			16.7	0.00176564	0.00210443
																			16.8	0.00102474	0.00224415
																			16.9	0.00177438	0.00241122
																			17	0.00138168	0.00174087
																			17.1	0.00106737	0.00200352
																			17.2	0.00169528	0.00110671
																			17.3	0.00153204	0.00129229
																			17.4	0.00127248	0.00195509
																			17.5	0.00221668	0.00167406
																			17.6	0.00142616	0.00204149
																			17.7	0.00178464	0.00196337
																			17.8	0.000829434	0.00284694
																			17.9	0.00163351	0.00179406
																			18	0.00142078	0.00211059
																			18.1	0.00158268	0.00162737
																			18.2	0.00180178	0.00208572
																			18.3	0.000919919	0.001026
																			18.4	0.00102607	0.00100885
																			18.5	0.00111526	0.000904497
																			18.6	0.00179047	0.00155424
																			18.7	0.00130633	0.00142039
																			18.8	0.000963184	0.00129629
																			18.9	0.000703868	0.00229023
																			19	0.000615123	0.00132207
																			19.1	0.00073699	0.000779878
																			19.2	0.000533798	0.000972392
																			19.3	0.000142162	0.000927675
																			19.4	0.000703015	0.00139674
																			19.5	0.000682581	0.00121358
																			19.6	0.000567097	0.00129724
																			19.7	0.000645868	0.000969458
																			19.8	0.00057666	0.00052879
																			19.9	0.000815441	0.000626096
																			20	0.000546978	0.000603305
																			20.1	0.000739442	0.00096437
																			20.2	0.000619355	0.000793474
																			20.3	0.00040904	0.00180047
																			20.4	0.00050058	0.000529816
																			20.5	0.000777745	0.000654887
																			20.6	0.000600199	0.00129833
																			20.7	0.000149824	0.000548861
																			20.8	0.000195925	0.000654863
																			20.9	0.000434966	0.00106853
																			21	0.000428014	0.000664307
																			21.1	0.00042464	0.000650554
																			21.2	0.000465276	0.000635622
																			21.3	0.000578246	0.000465004
																			21.4	0.000363392	0.000704591
																			21.5	0.000524948	0.00131398
																			21.6	0.000337857	0.00047914
																			21.7	6.49351e-05	0.0011042
																			21.8	0.000231429	0.000568296
																			21.9	0.000486198	0.000626691
																			22	0.000271408	0.000431363
																			22.1	0.000593329	0.000372007
																			22.2	0.000421496	0.000644596
																			22.3	0.000962286	0.000574557
																			22.4	0.000387514	0.000738313
																			22.5	0.000668771	0.000569275
																			22.6	0.00023336	0.000523084
																			22.7	8.23452e-05	0.000561282
																			22.8	0.000447926	0.000409166
																			22.9	0.000142655	0.00028211
																			23	0.000869315	0.000336736
																			23.1	0.000261315	0.000686874
																			23.2	0.000451055	0.000143102
																			23.3	0.000252016	0.000501851
																			23.4	9.28899e-05	8.38407e-05
																			23.5	0.000336821	0.000183772
																			23.6	0.000305557	0.00023242
																			23.7	0.000463125	0.000151888
																			23.8	0.00027187	0.000356624
																			23.9	2.79548e-05	0.000535976
																			24	0.000181867	0.000363523
																			24.1	0.000214495	7.06864e-05
																			24.2	0.000361754	0.000420522
																			24.3	9.05469e-05	0.0001309
																			24.4	0.000491961	0.000233136
																			24.5	0.000136091	0.000343086
																			24.6	0.000150562	6.64119e-05
																			24.7	0.000162338	3.35442e-05
																			24.8	0.00015692	0.000268773
																			24.9	4.97315e-05	0.000214254
																			25	0.000142987	0.000270222
																			25.1	2.79548e-05	0.000511568
																			25.2	0	6.21811e-05
																			25.3	0.000130617	0.00056196
																			25.4	0.000373073	0.000261344
																			25.5	0	0.00056287
																			25.6	0.000217694	0.000160546
																			25.7	0.000118502	0.000462646
																			25.8	0.000739619	5.81204e-05
																			25.9	0.000132077	0.000191764
																			26	0	0.000197306
																			26.1	0.000517207	0.00016326
																			26.2	0.000398787	3.96961e-05
																			26.3	0.000653929	2.40619e-05
																			26.4	0	0.0001211
																			26.5	0	4.50694e-05
																			26.6	0.000347618	0.000102508
																			26.7	5.07305e-05	6.23274e-05
																			26.8	2.79548e-05	6.76609e-05
																			26.9	0.000554388	0.000140268
																			27	0.000142162	7.04856e-05
																			27.1	0.00016009	4.50694e-05
																			27.2	0.000177625	0.00015167
																			27.3	0.000302513	0.000174128
																			27.4	0.000221163	9.44563e-05
																			27.5	0	4.3268e-05
																			27.6	0.000433799	0.000277457
																			27.7	0	3.02138e-05
																			27.8	0	0.000136724
																			27.9	0	0.000213492
																			28	4.97315e-05	0.00021083
																			28.1	0.000318705	1.81828e-05
																			28.2	0.000476668	2.83954e-05
																			28.3	0	9.2638e-05
																			28.4	0	4.50694e-05
																			28.5	0.000133076	1.20309e-05
																			28.6	0.000177625	0.00021599
																			28.7	0.000212962	1.20309e-05
																			28.8	0	2.83954e-05
																			28.9	8.03084e-05	0
																			29	0	0.000203831
																			29.1	9.05469e-05	8.24254e-05
																			29.2	0	6.32522e-05
																			29.3	0	9.01388e-05
																			29.4	0	0.000223513
																			29.5	0	1.81828e-05
																			29.6	8.23452e-05	0.000191183
																			29.7	0	4.50694e-05
																			29.8	0	0
																			29.9	0.000274637	6.61391e-05
																			30	0	0.000254402
																			30.1	0	0.000120496
																			30.2	9.14388e-05	0.000566748
																			30.3	0.000118502	3.02138e-05
																			30.4	0	9.01388e-05
																			30.5	8.70777e-05	0.00010217
																			30.6	0.000130617	0.000181794
																			30.7	0	0.000222181
																			30.8	0	0.000183749
																			30.9	0	0
																			31	0	4.50694e-05
																			31.1	9.05469e-05	0.000109312
																			31.2	0	4.50694e-05
																			31.3	0	5.71004e-05
																			31.4	0	0.000109312
																			31.5	0	9.94588e-05
																			31.6	0	5.08324e-05
																			31.7	0.000190292	0.000111894
																			31.8	0.00016157	6.32522e-05
																			31.9	0	8.24254e-05
																			32	0	0
																			32.1	0	0
																			32.2	9.05469e-05	0
																			32.3	0	0
																			32.4	0	0
																			32.5	0	4.50694e-05
																			32.6	9.05469e-05	0
																			32.7	0	6.42426e-05
																			32.8	0.000132135	2.00827e-05
																			32.9	0	1.81828e-05
																			33	9.05469e-05	2.17547e-05
																			33.1	0	8.77578e-05
																			33.2	0	6.42426e-05
																			33.3	0	6.42426e-05
																			33.4	0	4.50694e-05
																			33.5	0	0.000133654
																			33.6	0	0.000132527
																			33.7	8.23452e-05	6.37146e-05
																			33.8	0	0.000148568
																			33.9	0	0
																			34	0	0
																			34.1	0	0
																			34.2	0	0
																			34.3	0.000265837	0
																			34.4	0	6.42426e-05
																			34.5	8.70777e-05	0
																			34.6	0	6.42426e-05
																			34.7	0	0.000106678
																			34.8	0	0
																			34.9	0	0
																			35	0	0
																			35.1	0	0
																			35.2	0.000162338	0
																			35.3	0	0
																			35.4	0	0
																			35.5	0	0
																			35.6	8.70777e-05	0
																			35.7	0	0.000187427
																			35.8	0	0
																			35.9	0	6.42426e-05
																			36	0	0
																			36.1	0	3.82656e-05
																			36.2	0	0
																			36.3	0	6.42426e-05
																			36.4	0	0
																			36.5	0	4.50694e-05
																			36.6	0	1.81828e-05
																			36.7	2.79548e-05	0
																			36.8	0.000130617	0
																			36.9	0	0
																			37	0	0
																			37.1	0	0
																			37.2	0	0
																			37.3	0	0
																			37.4	0	0
																			37.5	0	0
																			37.6	0	0
																			37.7	0	0
																			37.8	8.70777e-05	0
																			37.9	9.05469e-05	0
																			38	0	4.50694e-05
																			38.1	0	0
																			38.2	0	4.50694e-05
																			38.3	0	0
																			38.4	0	0
																			38.5	0	0
																			38.6	0	4.50694e-05
																			38.7	8.70777e-05	4.50694e-05
																			38.8	0	0
																			38.9	0	1.81828e-05
																			39	0	4.50694e-05
																			39.1	0	0
																			39.2	0	0
																			39.3	0	0
																			39.4	0	0
																			39.5	0	0
																			39.6	0	4.50694e-05
																			39.7	0	0
																			39.8	0	0
																			39.9	0	0
																			40	0	0
																			40.1	0	0
																			40.2	0	2.15132e-05
																			40.3	0	0
																			40.4	0	0
																			40.5	0	0
																			40.6	0	0
																			40.7	0	0
																			40.8	0	1.20309e-05
																			40.9	0	0
																			41	0	0
																			41.1	0	0
																			41.2	0	0
																			41.3	0	0
																			41.4	0	2.15132e-05
																			41.5	0	0
																			41.6	0	0
																			41.7	0	0
																			41.8	0	0
																			41.9	0	0
																			42	0	0.000120496
																			42.1	0	0
																			42.2	0	0
																			42.3	0	0
																			42.4	0	0
																			42.5	0	0
																			42.6	0	0
																			42.7	0	0
																			42.8	0	0
																			42.9	0	0
																			43	0	0
																			43.1	0	0
																			43.2	0	0
																			43.3	0	0
																			43.4	0	0
																			43.5	0	0
																			43.6	0	4.50694e-05
																			43.7	0	0
																			43.8	0	0
																			43.9	0	0
																			44	0	0
																			44.1	0	0
																			44.2	0	0
																			44.3	0	0
																			44.4	0	0
																			44.5	0	0
																			44.6	0	0
																			44.7	0	0
																			44.8	0	0
																			44.9	0	0
																			45	0	0
																			45.1	0	0
																			45.2	0	6.42426e-05
																			45.3	0	0
																			45.4	0	0
																			45.5	0	0
																			45.6	0	0
																			45.7	0	0
																			45.8	0	0
																			45.9	0	0
																			46	0	0
																			46.1	0	0
																			46.2	0	3.77529e-05
																			46.3	0	0
																			46.4	0	0
																			46.5	0	0
																			46.6	0	0.000106678
																			46.7	0	0
																			46.8	0	0
																			46.9	0	0
																			47	0	0
																			47.1	0	0
																			47.2	0	0
																			47.3	0	0
																			47.4	0	0
																			47.5	0	0
																			47.6	0	0
																			47.7	0	0
																			47.8	0	0
																			47.9	0	0
																			48	0	0
																			48.1	0	0
																			48.2	0	0
																			48.3	0	0
																			48.4	0	0
																			48.5	0	0
																			48.6	0	0
																			48.7	0	0
																			48.8	0	0
																			48.9	0	0
																			49	0	0
																			49.1	0	0
																			49.2	0	0
																			49.3	0	0
																			49.4	0	0
																			49.5	0	4.50694e-05
																			49.6	0	0
																			49.7	0	0
																			49.8	0	0
																			49.9	0	0
																			50	0	0
