# Supplementary material for: Sensory experience inversely regulates feedforward and feedback excitation-inhibition ratio in rodent visual cortex
Source: eLife. 2018 Oct 12;7:e38846. doi: 10.7554/eLife.38846 (PMC6224193; doi:10.7554/eLife.38846)
Supplement: Figure 3—source data 1. [file elife-38846-fig3-data1.xlsx]

## Sheet: Sheet1
Figure 3 (continues below & right)
3B	Amp. CTR																Amp. MD													3G
Time	Cell_1	Cell_2	Cell_3	Cell_4	Cell_5	Cell_6	Cell_7	Cell_8	Cell_9	Cell_10	Cell_11	Cell_12	Cell_13	Cell_14		Time	Cell_1	Cell_2	Cell_3	Cell_4	Cell_5	Cell_6	Cell_7	Cell_8	Cell_9	Cell_10	Cell_11	Cell_12		Cell #	Post/Pre CTR	Post/Pre MD
-10	3.1261e-10	1.79847e-10	3.01157e-10	2.97385e-10	5.78678e-10	2.02335e-10	6.19299e-10	NaN	5.89272e-10	NaN	5.43339e-10	4.7378e-10	6.00105e-10	NaN		-10	4.20958e-10	2.89408e-10	2.85261e-10	6.29142e-10	6.85783e-10	3.51691e-10	1.44117e-10	5.34264e-10	3.95646e-10	5.67113e-10	4.56393e-10	3.61955e-10		1	0.5119	1.6421
-9	3.00212e-10	2.25144e-10	2.61167e-10	3.09061e-10	3.83434e-10	2.05854e-10	4.35618e-10	NaN	5.42259e-10	NaN	5.22429e-10	4.85502e-10	6.22105e-10	NaN		-9	4.80534e-10	3.95423e-10	2.98168e-10	6.57501e-10	7.29775e-10	4.08992e-10	1.33969e-10	5.11393e-10	4.02577e-10	5.97242e-10	5.41576e-10	3.55464e-10		2	0.2701	1.3693
-8	2.86389e-10	2.05755e-10	2.89884e-10	3.24761e-10	5.93768e-10	2.29253e-10	5.17783e-10	2.65667e-10	5.98399e-10	4.9264e-10	5.32845e-10	5.01304e-10	6.39718e-10	1.64136e-10		-8	4.66931e-10	4.1953e-10	3.26121e-10	7.2632e-10	6.77027e-10	3.47863e-10	1.17997e-10	5.0372e-10	3.93648e-10	6.24044e-10	3.41062e-10	3.2618e-10		3	0.2494	0.7968
-7	3.07325e-10	2.52846e-10	2.90417e-10	2.80121e-10	5.66143e-10	1.82382e-10	4.46223e-10	2.46523e-10	5.71835e-10	4.14301e-10	5.03554e-10	5.10097e-10	6.97594e-10	1.72023e-10		-7	4.68589e-10	3.77729e-10	2.52428e-10	4.98612e-10	7.07174e-10	3.55742e-10	1.02721e-10	4.52121e-10	3.14448e-10	5.88833e-10	3.62736e-10	3.42449e-10		4	0.5539	0.4357
-6	2.80296e-10	2.41195e-10	2.77262e-10	3.02152e-10	6.12199e-10	2.34594e-10	5.74645e-10	2.17063e-10	5.25483e-10	5.38096e-10	5.12827e-10	5.66234e-10	7.20092e-10	1.73006e-10		-6	4.65263e-10	4.167e-10	2.90074e-10	5.65283e-10	6.04103e-10	3.53691e-10	8.27122e-11	4.16357e-10	3.38778e-10	5.54853e-10	2.47829e-10	3.70571e-10		5	0.5507	0.7345
-5	3.16086e-10	2.06139e-10	1.91472e-10	2.40865e-10	6.94728e-10	3.13011e-10	5.58304e-10	2.67717e-10	5.55471e-10	5.33702e-10	4.45123e-10	4.9565e-10	5.90516e-10	2.26155e-10		-5	4.74328e-10	4.5021e-10	2.8275e-10	5.68583e-10	8.30689e-10	3.30802e-10	1.23938e-10	5.64978e-10	3.1972e-10	4.92102e-10	2.20077e-10	3.6377e-10		6	0.8832	0.8682
-4	3.23431e-10	1.99937e-10	2.19656e-10	2.99538e-10	4.46686e-10	2.58818e-10	4.97711e-10	2.15553e-10	4.87156e-10	5.00341e-10	4.91175e-10	5.40088e-10	5.98807e-10	1.56523e-10		-4	5.25327e-10	4.00041e-10	2.54052e-10	5.85318e-10	7.42667e-10	3.29669e-10	1.24775e-10	5.1791e-10	3.00216e-10	5.03803e-10	4.65004e-10	3.94872e-10		7	1.0202	1.1408
-3	2.84455e-10	2.22508e-10	2.8096e-10	3.82438e-10	3.30596e-10	2.07812e-10	5.24952e-10	2.23501e-10	5.17333e-10	4.71107e-10	5.21454e-10	5.68962e-10	6.85117e-10	2.69575e-10		-3	5.58328e-10	4.98758e-10	2.84527e-10	5.21131e-10	6.8979e-10	3.70677e-10	1.4181e-10	5.35893e-10	3.35652e-10	4.9462e-10	4.63583e-10	3.77729e-10		8	0.7171	0.7564
-2	3.05358e-10	1.72978e-10	2.9856e-10	3.42912e-10	6.25839e-10	2.23514e-10	4.68942e-10	2.35717e-10	4.83725e-10	4.39791e-10	3.83133e-10	5.70404e-10	6.85921e-10	1.88059e-10		-2	5.82789e-10	5.32831e-10	2.76286e-10	4.97193e-10	6.13146e-10	3.73749e-10	1.25084e-10	5.19553e-10	3.38689e-10	5.41281e-10	4.78419e-10	4.11893e-10		9	0.8235	0.82
-1	3.23719e-10	2.43117e-10	3.11456e-10	3.95252e-10	4.76393e-10	2.17444e-10	5.03489e-10	2.10055e-10	4.88223e-10	3.61723e-10	3.65352e-10	5.76495e-10	6.69734e-10	1.66444e-10		-1	5.71665e-10	4.67773e-10	2.77117e-10	5.39617e-10	5.76818e-10	3.25956e-10	7.68379e-11	5.10194e-10	3.46931e-10	5.21923e-10	2.25727e-10	3.66548e-10		10	0.5281	0.871
																														11	0.7577	0.6176
15	1.7565e-10	2.91576e-11	2.44746e-11	1.09041e-10	NaN	1.09008e-10	2.98504e-10	NaN	4.11062e-10	1.97309e-10	1.92922e-10	4.30704e-10	3.18757e-10	1.73516e-11		15	7.01305e-10	3.51721e-10	1.30525e-10	2.1951e-10	4.86089e-10	2.96291e-10	5.15638e-11	3.7148e-10	2.42055e-10	3.57104e-10	2.47596e-10	1.75252e-10		12	1.047	0.6599
16	1.95711e-10	3.30697e-11	2.47142e-11	1.20123e-10	2.14751e-10	9.70345e-11	5.31882e-10	1.39658e-10	3.85738e-10	1.76121e-10	1.54094e-10	4.87667e-10	2.73577e-10	1.61074e-11		16	8.54128e-10	5.47714e-10	1.43559e-10	2.37113e-10	4.3824e-10	1.96451e-10	5.64102e-11	3.71776e-10	2.85317e-10	4.19284e-10	2.42577e-10	2.21967e-10		13	0.7043
17	1.88882e-10	4.55046e-11	6.12682e-11	2.15913e-10	2.21316e-10	1.65951e-10	3.23074e-10	1.32196e-10	4.34629e-10	1.9379e-10	2.91867e-10	4.64132e-10	NaN	1.1829e-10		17	7.32397e-10	4.69717e-10	1.57165e-10	2.66383e-10	4.4923e-10	3.24829e-10	1.26516e-10	3.76331e-10	2.84363e-10	4.8268e-10	2.2216e-10	2.33076e-10		14	0.2188
18	1.37355e-10	6.00208e-11	5.12884e-11	2.50183e-10	2.41317e-10	1.94977e-10	4.06158e-10	1.12501e-10	2.87576e-10	2.46526e-10	3.09615e-10	4.04189e-10	2.86589e-10	5.50632e-11		18	8.90141e-10	5.19117e-10	2.00415e-10	2.65447e-10	4.90275e-10	3.25015e-10	1.26902e-10	3.66781e-10	2.88298e-10	3.78151e-10	2.15786e-10	2.68083e-10
19	1.84348e-10	9.89076e-11	1.29314e-10	2.41197e-10	2.17259e-10	1.44788e-10	4.55095e-10	1.52766e-10	4.11111e-10	2.3945e-10	2.04975e-10	4.79295e-10	3.1214e-10	NaN		19	9.08264e-10	5.49943e-10	1.5949e-10	2.13101e-10	4.72788e-10	3.09009e-10	1.19327e-10	3.83665e-10	2.69415e-10	4.76537e-10	NaN	2.51637e-10
20	1.82156e-10	1.47408e-10	1.74311e-10	2.90967e-10	2.35065e-10	1.20217e-10	4.36493e-10	1.49911e-10	4.44642e-10	2.38202e-10	2.08805e-10	5.93462e-10	3.68605e-10	5.4e-11		20	7.976e-10	4.59895e-10	1.70779e-10	2.29955e-10	5.01558e-10	3.21048e-10	1.35516e-10	3.53926e-10	2.83809e-10	4.57459e-10	2.01749e-10	1.86063e-10
21	1.77411e-10	7.39004e-11	1.22828e-10	2.11598e-10	2.5109e-10	1.57231e-10	5.70012e-10	NaN	4.04708e-10	2.41318e-10	3.36002e-10	4.65507e-10	4.35288e-10	2.55553e-11		21	8.1476e-10	4.98978e-10	1.67046e-10	2.267e-10	4.89905e-10	3.02008e-10	6.92591e-11	3.7507e-10	3.06507e-10	4.85469e-10	2.57052e-10	2.2757e-10
22	1.85494e-10	1.35595e-10	1.37565e-10	2.71813e-10	2.90192e-10	1.98303e-10	4.79766e-10	1.24305e-10	3.7632e-10	2.69427e-10	2.65214e-10	5.35286e-10	5.30257e-10	1.4856e-10		22	7.89055e-10	4.84337e-10	1.81443e-10	2.24919e-10	4.92672e-10	3.00377e-10	1.37894e-10	3.72512e-10	2.92483e-10	5.8108e-10	2.22366e-10	1.82676e-10
23	1.66248e-10	1.66514e-10	1.42185e-10	3.00597e-10	2.50175e-10	1.54507e-10	3.26142e-10	NaN	3.66467e-10	2.57734e-10	5.41973e-10	6.01622e-10	4.94037e-10	NaN		23	8.54484e-10	6.02483e-10	1.65731e-10	1.89299e-10	4.79779e-10	3.47445e-10	1.49811e-10	3.83337e-10	2.96135e-10	4.94464e-10	2.82797e-10	2.89915e-10
24	1.8704e-10	1.57523e-10	1.74176e-10	2.29354e-10	3.85247e-10	2.64507e-10	4.59727e-10	1.20969e-10	3.43354e-10	2.44278e-10	3.07863e-10	5.64219e-10	6.01915e-10	NaN		24	7.94374e-10	3.81777e-10	1.76451e-10	2.11572e-10	4.94783e-10	3.25072e-10	1.43673e-10	3.89257e-10	3.50014e-10	5.03402e-10	2.7005e-10	2.77852e-10
25	1.68482e-10	1.22116e-11	2.2875e-11	1.26079e-10	2.31919e-10	2.35434e-10	6.04277e-10	NaN	3.68473e-10	NaN	4.41856e-10	5.79514e-10	5.55204e-10	NaN		25	7.87906e-10	5.07529e-10	2.62414e-10	3.1158e-10	5.17073e-10	3.09249e-10	1.34909e-10	3.95539e-10	2.79613e-10	5.12467e-10	2.55292e-10	2.60679e-10
26	1.4086e-10	1.69049e-11	2.40013e-11	9.48978e-11	3.94946e-10	2.41439e-10	5.91475e-10	1.34583e-10	3.41023e-10	NaN	3.57301e-10	5.5371e-10	5.50489e-10	NaN		26	7.57594e-10	5.17979e-10	2.02227e-10	NaN	NaN	2.75083e-10	1.33587e-10	4.67201e-10	3.12225e-10	4.77678e-10	2.89972e-10	2.65962e-10
27	2.10479e-10	3.59017e-11	2.51497e-11	9.59447e-11	2.80309e-10	2.70524e-10	5.899e-10	1.29078e-10	3.54165e-10	2.58204e-10	3.33387e-10	6.36667e-10	5.03178e-10	NaN		27	7.78307e-10	3.60814e-10	2.04851e-10	NaN	4.96867e-10	2.83363e-10	1.63285e-10	3.91184e-10	2.81075e-10	4.90377e-10	2.38003e-10	2.38704e-10
28	1.97405e-10	8.02995e-12	2.17897e-11	1.36051e-10	2.44153e-10	1.58324e-10	5.77221e-10	NaN	3.60696e-10	2.59098e-10	3.2448e-10	5.45423e-10	5.16722e-10	NaN		28	7.62459e-10	5.65831e-10	1.89401e-10	2.15967e-10	NaN	3.09253e-10	1.27276e-10	4.15565e-10	2.84279e-10	4.64885e-10	2.03355e-10	2.93757e-10
29	1.98456e-10	3.09714e-11	3.34635e-11	9.50449e-11	2.33271e-10	1.80465e-10	5.46219e-10	NaN	3.39344e-10	2.57529e-10	2.95243e-10	5.62205e-10	4.43085e-10	NaN		29	8.83563e-10	6.21891e-10	2.42805e-10	2.54446e-10	5.03974e-10	3.34776e-10	1.35086e-10	4.79074e-10	3.21429e-10	4.72163e-10	2.18346e-10	2.05771e-10
30	1.56945e-10	4.08978e-11	5.87865e-11	1.2886e-10	3.66849e-10	2.05466e-10	4.82458e-10	NaN	4.54197e-10	2.2918e-10	3.63733e-10	5.82296e-10	NaN	NaN		30	7.64162e-10	6.22534e-10	1.91078e-10	1.67788e-10	4.95626e-10	3.12818e-10	1.39736e-10	4.72071e-10	3.02256e-10	4.7454e-10	2.09965e-10	2.67749e-10
31	1.71065e-10	4.34577e-11	2.39036e-11	1.57689e-10	2.3193e-10	1.666e-10	5.65791e-10	NaN	4.84249e-10	NaN	4.04055e-10	6.04944e-10	4.24266e-10	NaN		31	7.67294e-10	5.29255e-10	2.18326e-10	2.49537e-10	5.01667e-10	3.25395e-10	1.04735e-10	4.65799e-10	2.67021e-10	5.37374e-10	NaN	2.72384e-10
32	1.86264e-10	4.2487e-11	6.78672e-11	1.48383e-10	2.6188e-10	2.0488e-10	5.3491e-10	2.01591e-10	5.0008e-10	NaN	NaN	4.66784e-10	3.78827e-10	NaN		32	8.00936e-10	5.58973e-10	2.35221e-10	3.08898e-10	NaN	2.90611e-10	1.05412e-10	4.42686e-10	3.48762e-10	4.95073e-10	2.49123e-10	2.34971e-10
33	1.64788e-10	3.86296e-11	4.71335e-11	1.25549e-10	2.13676e-10	2.34844e-10	5.10665e-10	2.26091e-10	5.04983e-10	2.4215e-10	2.24968e-10	4.91013e-10	NaN	NaN		33	7.6663e-10	5.68769e-10	2.67416e-10	2.85574e-10	NaN	NaN	1.44857e-10	3.97385e-10	3.25525e-10	4.84195e-10	1.90338e-10	2.6662e-10
34	1.82617e-10	1.82116e-11	2.74518e-11	8.85612e-11	NaN	2.6859e-10	5.31939e-10	2.36126e-10	4.674e-10	NaN	2.85408e-10	4.68247e-10	3.47331e-10	NaN		34	7.64066e-10	5.38173e-10	2.66417e-10	2.80531e-10	4.85301e-10	NaN	NaN	3.60624e-10	2.58541e-10	4.46359e-10	2.47229e-10	2.28533e-10
35	1.36463e-10	4.28861e-11	6.3209e-11	1.37225e-10	3.34787e-10	1.54565e-10	5.71865e-10	2.23713e-10	4.51929e-10	NaN	3.64597e-10	5.10042e-10	NaN	NaN		35	7.65652e-10	5.33268e-10	2.88076e-10	NaN	5.48955e-10	NaN	1.63251e-10	3.83859e-10	2.59864e-10	4.32344e-10	2.36372e-10	2.51383e-10
36	1.89262e-10	3.7181e-11	3.1252e-11	1.79238e-10	2.44741e-10	2.2424e-10	6.62941e-10	NaN	4.79679e-10	NaN	2.73351e-10	5.35378e-10	4.36356e-10	NaN		36	8.48432e-10	6.01156e-10	2.90251e-10	3.41726e-10	5.00469e-10	NaN	1.28607e-10	3.52909e-10	3.20189e-10	5.88161e-10	2.42572e-10	2.5e-10
37	2.01435e-10	4.77051e-11	7.49759e-11	1.99107e-10	2.04016e-10	1.41829e-10	5.90709e-10	NaN	5.2413e-10	1.14143e-10	2.76324e-10	5.09838e-10	4.37959e-10	NaN		37	8.79813e-10	7.01025e-10	1.7927e-10	1.7134e-10	5.52871e-10	NaN	1.36407e-10	3.91297e-10	3.36972e-10	4.69925e-10	1.92514e-10	2.2e-10
38	1.20035e-10	3.9612e-11	3.96823e-11	1.19852e-10	2.43777e-10	1.55368e-10	5.9948e-10	NaN	4.89397e-10	2.2722e-10	2.70074e-10	4.48243e-10	NaN	NaN		38	8.93144e-10	6.58598e-10	2.82837e-10	NaN	5.35628e-10	3.16034e-10	1.60166e-10	3.49434e-10	3.10807e-10	4.74964e-10	2.25275e-10	2.16946e-10
39	7.14551e-11	4.12135e-11	3.7752e-11	1.51885e-10	3.47684e-10	2.22867e-10	5.82275e-10	NaN	4.5539e-10	3.31849e-10	6.15227e-10	6.30144e-10	NaN	NaN		39	9.47896e-10	7.64868e-10	2.29601e-10	NaN	5.34365e-10	3.05729e-10	1.32378e-10	3.52176e-10	3.04736e-10	4.76141e-10	2.19717e-10	2.47216e-10
40	4.49225e-11	4.56042e-11	4.6263e-11	1.59972e-10	3.85949e-10	2.51145e-10	6.50625e-10	NaN	4.95946e-10	NaN	5.66275e-10	5.82313e-10	NaN	NaN		40	9.28353e-10	7.07147e-10	3.11214e-10	3.42406e-10	5.30951e-10	3.29848e-10	NaN	3.29234e-10	2.70906e-10	4.7206e-10	2.35717e-10	1.97867e-10
41	1.04419e-10	3.96523e-11	6.79837e-11	2.14758e-10	4.04614e-10	NaN	7.2715e-10	NaN	4.40786e-10	2.53399e-10	5.26506e-10	5.3563e-10	NaN	NaN		41	8.15892e-10	6.97144e-10	2.9812e-10	3.14717e-10	4.89997e-10	3.05266e-10	NaN	2.96641e-10	2.32523e-10	4.69538e-10	2.42633e-10	2.25525e-10
42	8.91654e-11	4.77806e-11	5.57025e-11	2.24568e-10	3.3106e-10	NaN	4.11617e-10	NaN	6.2168e-10	2.99568e-10	6.14098e-10	6.04007e-10	NaN	NaN		42	9.0784e-10	6.88815e-10	NaN	NaN	4.76327e-10	2.66874e-10	1.50262e-10	2.89304e-10	2.13969e-10	4.15924e-10	2.00862e-10	2.65889e-10
43	1.52679e-10	4.21914e-11	4.35436e-11	1.9563e-10	3.59207e-10	2.65358e-10	3.57992e-10	NaN	5.54154e-10	NaN	NaN	6.45177e-10	NaN	NaN		43	7.75932e-10	7.27326e-10	NaN	NaN	4.81258e-10	2.92671e-10	1.32498e-10	3.1709e-10	1.94873e-10	4.02536e-10	2.55751e-10	2.31484e-10
44	7.5612e-11	NaN	7.2125e-11	2.46915e-10	3.6409e-10	NaN	2.35628e-10	1.56441e-10	4.4057e-10	NaN	NaN	6.65435e-10	NaN	NaN		44	8.55292e-10	6.76982e-10	NaN	NaN	4.97923e-10	NaN	1.32276e-10	3.57209e-10	2.09124e-10	3.68735e-10	2.49226e-10	NaN
45	1.24898e-10	4.43516e-11	6.81139e-11	1.89773e-10	3.06359e-10	NaN	1.39561e-10	NaN	4.49816e-10	NaN	NaN	6.62271e-10	NaN	NaN		45	9.10308e-10	6.62115e-10	NaN	NaN	4.66395e-10	2.83252e-10	1.65314e-10	NaN	2.07364e-10	4.31235e-10	2.80964e-10	NaN
46	NaN	5.37389e-11	6.76497e-11	2.06033e-10	4.13253e-10	2.52876e-10	2.21079e-10	NaN	5.16676e-10	NaN	NaN	6.8631e-10	NaN	NaN		46	NaN	5.84313e-10	NaN	NaN	3.85585e-10	NaN	NaN	4.27074e-10	2.38496e-10	4.6466e-10	1.60833e-10	NaN
47	NaN	1.04714e-10	1.58018e-10	2.37117e-10	5.35111e-10	3.26716e-10	1.91947e-10	NaN	6.8355e-10	NaN	NaN	5.13908e-10	NaN	NaN		47	NaN	5.42271e-10	NaN	NaN	4.64824e-10	2.33673e-10	1.28489e-10	4.39243e-10	NaN	6.07322e-10	2.06719e-10	NaN
48	NaN	8.51257e-11	1.00456e-10	2.72253e-10	2.64827e-10	2.64083e-10	2.25738e-10	NaN	5.1409e-10	NaN	NaN	NaN	NaN	NaN		48	NaN	5.53602e-10	NaN	NaN	5.13364e-10	NaN	NaN	4.73271e-10	2.87917e-10	5.04805e-10	2.12142e-10	NaN
49	NaN	1.45732e-10	1.88551e-10	2.90308e-10	4.86283e-10	1.5468e-10	3.55787e-10	NaN	5.16285e-10	NaN	NaN	NaN	NaN	NaN		49	NaN	5.3217e-10	NaN	NaN	4.53708e-10	2.22814e-10	1.10225e-10	3.94054e-10	NaN	5.80568e-10	2.23043e-10	NaN
50	NaN	NaN	1.09849e-10	2.27221e-10	2.76109e-10	2.16221e-10	3.46949e-10	NaN	4.52935e-10	NaN	NaN	NaN	NaN	NaN		50	NaN	5.51028e-10	NaN	NaN	4.57257e-10	2.94755e-10	1.15074e-10	3.94883e-10	NaN	5.51792e-10	NaN	NaN
51	NaN	7.32754e-11	1.14511e-10	2.5336e-10	4.74757e-10	1.85569e-10	NaN	NaN	5.15893e-10	NaN	NaN	NaN	NaN	NaN		51	NaN	5.08042e-10	NaN	NaN	4.10232e-10	1.99044e-10	1.70641e-10	4.12169e-10	NaN	6.02525e-10	NaN	NaN
52	NaN	1.15096e-10	1.42989e-10	2.49307e-10	4.69308e-10	NaN	NaN	NaN	4.52614e-10	NaN	NaN	NaN	NaN	NaN		52	NaN	5.30761e-10	NaN	NaN	4.59563e-10	3.00389e-10	NaN	4.2221e-10	NaN	5.7036e-10	NaN	NaN
53	NaN	5.80599e-11	5.33789e-11	2.03291e-10	4.85969e-10	2.46908e-10	NaN	NaN	4.92549e-10	NaN	NaN	NaN	NaN	NaN		53	NaN	6.66309e-10	NaN	NaN	NaN	NaN	NaN	4.169e-10	NaN	5.48023e-10	NaN	NaN
54	NaN	1.34795e-10	1.20808e-10	2.76233e-10	NaN	2.2027e-10	NaN	NaN	5.50231e-10	NaN	NaN	NaN	NaN	NaN		54	NaN	6.25171e-10	NaN	NaN	4.98048e-10	3.17738e-10	NaN	3.98604e-10	NaN	5.09587e-10	NaN	NaN
3C	Rin CTR																Rin MD
Time	Cell_1	Cell_2	Cell_3	Cell_4	Cell_5	Cell_6	Cell_7	Cell_8	Cell_9	Cell_10	Cell_11	Cell_12	Cell_13	Cell_14		Time	Cell_1	Cell_2	Cell_3	Cell_4	Cell_5	Cell_6	Cell_7	Cell_8	Cell_9	Cell_10	Cell_11	Cell_12
-10	2.2711e+08	2.76077e+08	2.39869e+08	1.77792e+08	2.02667e+08	1.87415e+08	1.90754e+08	NaN	2.47269e+08	NaN	2.25157e+08	2.34988e+08	2.94438e+08	NaN		-10	1.77209e+08	2.16959e+08	2.13973e+08	2.52402e+08	1.87777e+08	1.71621e+08	2.08868e+08	3.15552e+08	4.60397e+08	2.29669e+08	2.01169e+08	3.13513e+08
-9	2.19644e+08	2.68546e+08	2.2928e+08	1.88924e+08	2.00954e+08	1.61388e+08	1.98328e+08	NaN	2.08088e+08	NaN	2.05871e+08	2.39222e+08	2.41753e+08	NaN		-9	1.80958e+08	2.33228e+08	2.19911e+08	2.33728e+08	1.97125e+08	1.70967e+08	1.87718e+08	2.63948e+08	4.23863e+08	2.33397e+08	1.6095e+08	3.13671e+08
-8	2.15632e+08	2.87683e+08	2.2492e+08	1.84649e+08	2.161e+08	1.74581e+08	1.89879e+08	3.3e+08	2.70411e+08	2.41083e+08	2.28205e+08	2.27046e+08	2.12599e+08	2.76251e+08		-8	1.71081e+08	2.25419e+08	1.92213e+08	2.38855e+08	2.12736e+08	1.52494e+08	1.71521e+08	2.97359e+08	4.73097e+08	1.94016e+08	1.44088e+08	2.70374e+08
-7	2.27638e+08	2.80537e+08	2.18648e+08	1.78232e+08	1.91465e+08	1.71115e+08	1.92852e+08	3.23648e+08	2.24849e+08	2.35832e+08	2.20183e+08	2.33953e+08	2.22394e+08	2.38883e+08		-7	1.60118e+08	2.15763e+08	2.08466e+08	2.41954e+08	2.00778e+08	1.76588e+08	1.49097e+08	3.66772e+08	3.61729e+08	2.19241e+08	1.28376e+08	2.57566e+08
-6	2.29904e+08	2.6246e+08	2.18324e+08	1.90073e+08	1.91883e+08	1.64733e+08	1.91595e+08	3.50726e+08	2.27526e+08	2.0484e+08	2.20047e+08	2.2443e+08	1.95049e+08	2.91445e+08		-6	1.41214e+08	2.17886e+08	2.10744e+08	2.67474e+08	2.2022e+08	1.76852e+08	1.5772e+08	2.99926e+08	4.47594e+08	2.22015e+08	1.34038e+08	2.8395e+08
-5	2.31629e+08	2.77972e+08	2.16246e+08	1.55579e+08	1.86785e+08	1.66398e+08	1.87917e+08	3.15876e+08	2.57101e+08	2.253e+08	2.05669e+08	2.25389e+08	2.16933e+08	2.43576e+08		-5	1.29928e+08	1.95285e+08	2.10369e+08	2.39953e+08	2.20337e+08	1.91273e+08	1.61364e+08	2.56973e+08	4.58569e+08	2.08266e+08	1.25864e+08	3.05781e+08
-4	2.36582e+08	2.53948e+08	2.06907e+08	2.06215e+08	1.91459e+08	1.9128e+08	2.0258e+08	3.24714e+08	2.21033e+08	2.27953e+08	2.07115e+08	2.20724e+08	2.49928e+08	2.40675e+08		-4	1.4055e+08	2.15955e+08	1.97103e+08	2.31073e+08	2.01267e+08	1.77767e+08	1.41155e+08	2.85078e+08	4.04287e+08	2.15696e+08	1.24731e+08	2.5779e+08
-3	2.35822e+08	2.62042e+08	2.21234e+08	1.95366e+08	1.92882e+08	1.70721e+08	2.06083e+08	3.45093e+08	2.13257e+08	2.24356e+08	2.05342e+08	2.39515e+08	2.09637e+08	1.89412e+08		-3	1.31755e+08	1.96228e+08	2.06231e+08	2.80036e+08	2.02288e+08	1.61987e+08	1.33181e+08	2.9658e+08	4.88314e+08	2.09739e+08	1.26003e+08	2.673e+08
-2	2.15953e+08	2.68204e+08	1.93833e+08	1.84273e+08	2.10515e+08	1.71164e+08	1.89353e+08	3.41577e+08	2.02509e+08	2.30729e+08	2.34326e+08	2.38898e+08	2.11148e+08	1.74324e+08		-2	1.27754e+08	1.71786e+08	1.88682e+08	2.43361e+08	2.033e+08	1.26013e+08	1.41305e+08	2.59717e+08	4.4044e+08	2.46191e+08	1.25563e+08	2.90551e+08
-1	2.07545e+08	2.90889e+08	2.32655e+08	1.94192e+08	1.89813e+08	1.90018e+08	1.93478e+08	3.20826e+08	2.37683e+08	2.04097e+08	2.23934e+08	2.28577e+08	2.033e+08	1.58049e+08		-1	1.40512e+08	1.89164e+08	1.96206e+08	2.53366e+08	2.37321e+08	1.67256e+08	1.38303e+08	3.02044e+08	4.96737e+08	2.19462e+08	1.42338e+08	3.054e+08
15	1.85062e+08	3.23599e+08	2.72573e+08	1.91176e+08	NaN	1.96557e+08	1.96783e+08	NaN	2.40354e+08	2.34951e+08	2.10911e+08	1.44074e+08	1.27004e+08	1.54642e+08		15	1.54395e+08	1.2019e+08	2.09736e+08	2.56477e+08	2.34136e+08	1.9252e+08	1.40425e+08	3.19744e+08	5.13593e+08	2.22391e+08	1.38573e+08	2.59469e+08
16	2.02465e+08	2.97013e+08	2.93263e+08	1.90517e+08	2.01497e+08	2.02458e+08	2.08434e+08	3.09187e+08	2.30402e+08	2.14699e+08	2.46654e+08	1.54575e+08	1.33175e+08	1.62661e+08		16	1.52893e+08	1.18986e+08	2.06954e+08	2.50697e+08	2.1694e+08	1.64857e+08	1.42834e+08	2.87134e+08	4.76107e+08	2.11077e+08	1.32756e+08	2.73324e+08
17	2.17148e+08	3.31433e+08	2.79668e+08	1.91813e+08	1.91432e+08	1.87732e+08	2.02921e+08	3.25108e+08	1.96587e+08	2.39793e+08	2.13965e+08	1.58397e+08	NaN	1.53804e+08		17	1.43302e+08	1.1857e+08	2.22731e+08	2.45662e+08	2.16723e+08	1.748e+08	1.47958e+08	3.11952e+08	4.07203e+08	2.34733e+08	1.35101e+08	2.63726e+08
18	2.1458e+08	3.00277e+08	2.98407e+08	1.87744e+08	1.89095e+08	1.69909e+08	2.06847e+08	3.52803e+08	2.29247e+08	2.30222e+08	1.98259e+08	1.73163e+08	1.28103e+08	1.47213e+08		18	1.4315e+08	1.0702e+08	1.9548e+08	2.61367e+08	2.27735e+08	1.74492e+08	1.48032e+08	2.69547e+08	3.78885e+08	2.16003e+08	1.45645e+08	2.55719e+08
19	2.11724e+08	3.43045e+08	3.01477e+08	1.84854e+08	1.99541e+08	1.72437e+08	2.0837e+08	3.06018e+08	2.3151e+08	2.05175e+08	1.80375e+08	1.73154e+08	1.35842e+08	NaN		19	1.50238e+08	1.08822e+08	2.07766e+08	2.62133e+08	1.99784e+08	2.13304e+08	1.40464e+08	2.67886e+08	3.86044e+08	2.20249e+08	NaN	2.51579e+08
20	2.17246e+08	3.22506e+08	3.18415e+08	1.96708e+08	1.98101e+08	2.00012e+08	2.23786e+08	3.21823e+08	2.50926e+08	2.17604e+08	2.01301e+08	1.57609e+08	1.28548e+08	1.59653e+08		20	1.46202e+08	1.09714e+08	2.11029e+08	2.53928e+08	2.15294e+08	1.66823e+08	1.48931e+08	2.96728e+08	3.70252e+08	2.13088e+08	1.51351e+08	2.41933e+08
21	2.2672e+08	3.13617e+08	3.24833e+08	1.91781e+08	2.04617e+08	1.92107e+08	2.04602e+08	NaN	2.10399e+08	2.26602e+08	2.19144e+08	1.62912e+08	1.45607e+08	1.7221e+08		21	1.57166e+08	1.06293e+08	2.05921e+08	2.52637e+08	2.66654e+08	1.55426e+08	1.43336e+08	2.6682e+08	4.101e+08	1.97622e+08	1.53257e+08	2.9776e+08
22	2.06753e+08	2.97207e+08	2.96839e+08	1.94469e+08	2.15098e+08	1.73236e+08	1.86495e+08	3.48462e+08	2.47559e+08	2.25816e+08	2.26709e+08	1.71969e+08	1.44569e+08	1.49991e+08		22	1.3842e+08	1.04402e+08	2.20366e+08	2.74727e+08	2.27451e+08	1.66692e+08	1.51083e+08	2.66938e+08	3.46709e+08	1.9107e+08	1.51843e+08	3.02392e+08
23	2.10252e+08	3.47842e+08	3.15469e+08	2.00942e+08	1.74309e+08	1.9621e+08	1.99584e+08	NaN	2.29132e+08	2.15107e+08	1.9928e+08	1.90841e+08	1.53284e+08	NaN		23	1.49324e+08	1.08856e+08	2.11757e+08	2.67536e+08	2.46071e+08	1.59141e+08	1.482e+08	2.68106e+08	3.6403e+08	1.8385e+08	1.49477e+08	2.95335e+08
24	2.29192e+08	3.46656e+08	3.26365e+08	1.99602e+08	1.78394e+08	1.62873e+08	2.01533e+08	3.46309e+08	2.3076e+08	2.25909e+08	2.14682e+08	1.822e+08	1.52312e+08	NaN		24	1.42582e+08	1.11608e+08	2.37238e+08	2.39635e+08	2.24093e+08	1.61887e+08	1.47532e+08	2.73298e+08	3.69092e+08	2.04656e+08	1.32359e+08	2.65096e+08
25	2.3155e+08	3.42293e+08	3.11506e+08	1.90676e+08	1.84304e+08	1.72644e+08	2.17478e+08	NaN	2.45478e+08	NaN	2.11726e+08	1.69001e+08	1.52689e+08	NaN		25	1.49955e+08	1.09529e+08	2.11319e+08	2.53215e+08	2.07511e+08	1.58154e+08	1.38155e+08	2.9559e+08	4.05035e+08	2.07997e+08	1.35403e+08	2.69593e+08
26	2.32891e+08	3.39911e+08	2.7578e+08	1.97077e+08	1.75355e+08	1.64469e+08	1.88471e+08	3.41308e+08	2.39309e+08	NaN	2.04506e+08	1.77103e+08	1.51085e+08	NaN		26	1.35342e+08	1.03708e+08	2.05331e+08	NaN	NaN	1.52925e+08	1.40745e+08	2.88157e+08	4.65409e+08	2.1718e+08	1.40726e+08	2.33709e+08
27	2.01831e+08	3.34692e+08	3.15712e+08	2.14159e+08	1.86868e+08	1.7737e+08	2.06837e+08	3.6215e+08	2.69364e+08	2.42303e+08	2.00615e+08	1.77603e+08	1.50104e+08	NaN		27	1.36626e+08	1.07886e+08	2.17933e+08	NaN	2.60016e+08	1.6527e+08	1.36987e+08	2.52181e+08	4.5275e+08	1.94517e+08	1.45208e+08	2.63528e+08
28	2.00067e+08	3.15035e+08	2.76641e+08	1.79397e+08	2.14692e+08	1.89209e+08	1.97131e+08	NaN	2.4068e+08	2.51116e+08	2.17735e+08	1.70169e+08	1.46035e+08	NaN		28	1.47723e+08	1.04312e+08	2.31832e+08	2.79614e+08	NaN	1.48107e+08	1.48792e+08	2.60557e+08	3.82567e+08	1.78157e+08	1.54196e+08	2.84974e+08
29	2.16105e+08	2.7505e+08	2.86568e+08	1.81818e+08	2.28939e+08	1.94138e+08	2.01419e+08	NaN	2.05927e+08	2.66738e+08	2.08096e+08	1.70136e+08	1.29247e+08	NaN		29	1.28402e+08	1.13986e+08	2.29754e+08	2.86214e+08	2.41877e+08	1.76686e+08	1.46275e+08	3.12755e+08	3.63021e+08	1.76984e+08	1.40846e+08	2.66166e+08
30	1.98729e+08	3.04249e+08	3.01122e+08	1.94079e+08	2.0067e+08	1.93191e+08	2.35901e+08	NaN	2.45671e+08	2.52988e+08	2.26632e+08	1.60799e+08	NaN	NaN		30	1.29502e+08	1.14225e+08	2.10074e+08	2.51101e+08	2.33714e+08	1.51294e+08	1.47151e+08	2.97165e+08	4.9986e+08	2.05594e+08	1.49512e+08	2.54925e+08
31	2.01866e+08	3.286e+08	2.97622e+08	2.03899e+08	2.06958e+08	1.75115e+08	2.07013e+08	NaN	2.16197e+08	NaN	2.12529e+08	1.54684e+08	1.44314e+08	NaN		31	1.33397e+08	1.11407e+08	2.15328e+08	2.61756e+08	2.36755e+08	1.62935e+08	1.41488e+08	3.08597e+08	4.48682e+08	2.33372e+08	NaN	3.02797e+08
32	2.09633e+08	3.33605e+08	2.64584e+08	2.03077e+08	1.95136e+08	1.82357e+08	2.03462e+08	3.3863e+08	2.25337e+08	NaN	NaN	1.75558e+08	1.3143e+08	NaN		32	1.38835e+08	1.14508e+08	2.25726e+08	2.83285e+08	NaN	1.57195e+08	1.39457e+08	2.70284e+08	4.51923e+08	1.73e+08	1.39218e+08	3.15424e+08
33	2.12022e+08	3.24021e+08	2.87375e+08	1.94845e+08	1.82938e+08	1.76225e+08	2.03962e+08	3.20264e+08	2.0496e+08	2.43742e+08	1.85598e+08	1.71284e+08	NaN	NaN		33	1.2928e+08	1.18108e+08	2.12396e+08	2.68836e+08	NaN	NaN	1.43001e+08	2.68115e+08	4.66063e+08	1.90436e+08	1.34282e+08	2.9366e+08
34	2.04038e+08	3.00815e+08	2.98245e+08	1.96377e+08	NaN	1.6922e+08	2.08507e+08	3.12566e+08	2.40541e+08	NaN	1.86644e+08	1.86536e+08	1.37571e+08	NaN		34	1.27214e+08	1.12741e+08	2.07993e+08	2.53514e+08	2.43675e+08	NaN	NaN	2.82635e+08	4.50998e+08	2.01528e+08	1.51013e+08	3.11041e+08
35	2.02784e+08	2.87365e+08	2.4876e+08	1.82902e+08	2.05009e+08	1.79069e+08	2.2496e+08	3.33383e+08	2.28034e+08	NaN	1.71532e+08	1.66028e+08	NaN	NaN		35	1.2118e+08	1.13848e+08	1.98501e+08	NaN	2.26116e+08	NaN	1.50034e+08	2.69857e+08	5.05956e+08	1.95059e+08	1.44578e+08	2.54876e+08
36	1.92412e+08	2.85255e+08	2.3834e+08	1.85637e+08	2.06144e+08	1.94024e+08	2.29228e+08	NaN	2.52418e+08	NaN	1.98886e+08	1.60639e+08	1.34378e+08	NaN		36	1.32886e+08	1.12637e+08	2.01013e+08	2.1639e+08	2.58908e+08	NaN	1.37943e+08	2.59297e+08	4.37578e+08	2.06854e+08	1.4207e+08	NaN
37	1.86894e+08	2.4417e+08	2.22737e+08	1.72142e+08	2.0028e+08	1.7464e+08	2.10382e+08	NaN	2.29784e+08	2.03544e+08	1.83826e+08	1.79847e+08	1.48231e+08	NaN		37	1.33925e+08	1.14895e+08	2.07109e+08	2.91032e+08	2.2069e+08	NaN	1.52184e+08	2.79405e+08	4.59109e+08	1.92869e+08	1.40517e+08	NaN
38	1.72325e+08	2.55347e+08	1.9223e+08	1.66836e+08	1.92373e+08	1.78411e+08	2.06355e+08	NaN	2.0763e+08	2.07001e+08	2.03713e+08	1.8653e+08	NaN	NaN		38	1.2754e+08	1.11346e+08	1.93495e+08	NaN	2.38529e+08	1.59044e+08	1.53609e+08	2.77775e+08	4.49221e+08	1.87279e+08	1.47866e+08	2.57241e+08
39	1.63187e+08	2.48689e+08	1.83221e+08	1.60074e+08	1.87293e+08	1.5711e+08	1.93651e+08	NaN	2.13043e+08	1.89092e+08	2.04171e+08	1.77398e+08	NaN	NaN		39	1.21415e+08	1.17573e+08	1.90354e+08	NaN	2.43504e+08	1.60471e+08	1.49401e+08	2.59874e+08	3.58876e+08	1.80086e+08	1.43589e+08	2.94434e+08
40	1.15379e+08	2.47946e+08	1.76472e+08	1.66592e+08	2.0568e+08	1.65333e+08	2.15229e+08	NaN	2.56175e+08	NaN	1.98946e+08	1.70136e+08	NaN	NaN		40	1.17362e+08	1.12269e+08	1.89351e+08	2.63384e+08	2.24832e+08	1.56291e+08	NaN	2.99022e+08	3.74817e+08	1.84089e+08	1.43364e+08	2.71745e+08
41	1.55125e+08	2.58974e+08	1.80542e+08	1.77535e+08	1.95455e+08	NaN	2.09616e+08	NaN	2.29816e+08	2.10215e+08	2.1055e+08	1.81889e+08	NaN	NaN		41	1.25306e+08	1.1086e+08	1.74844e+08	2.72505e+08	2.54427e+08	1.58209e+08	NaN	2.76462e+08	4.18063e+08	1.7462e+08	1.40983e+08	3.28082e+08
42	1.35437e+08	2.60173e+08	1.80699e+08	1.66741e+08	1.78065e+08	NaN	2.15299e+08	NaN	2.34918e+08	2.04202e+08	2.28458e+08	1.76637e+08	NaN	NaN		42	1.23673e+08	1.15128e+08	NaN	NaN	2.3249e+08	1.61021e+08	1.48471e+08	3.04234e+08	5.10777e+08	1.98315e+08	1.48296e+08	3.20027e+08
43	1.31866e+08	2.24363e+08	1.83167e+08	1.54594e+08	2.05326e+08	1.71347e+08	1.87719e+08	NaN	2.32569e+08	NaN	NaN	2.2231e+08	NaN	NaN		43	1.24169e+08	1.14186e+08	NaN	NaN	2.58484e+08	1.46412e+08	1.42659e+08	3.20996e+08	4.62129e+08	2.00107e+08	1.67112e+08	2.81252e+08
44	1.35645e+08	NaN	1.84619e+08	1.79225e+08	2.03719e+08	NaN	1.94814e+08	2.94401e+08	2.24544e+08	NaN	NaN	1.91612e+08	NaN	NaN		44	1.22397e+08	1.14463e+08	NaN	NaN	2.54246e+08	NaN	1.41328e+08	2.52833e+08	4.52251e+08	2.01125e+08	1.38932e+08	NaN
45	1.11855e+08	2.73926e+08	1.84528e+08	1.60168e+08	1.81068e+08	NaN	1.98452e+08	NaN	2.35538e+08	NaN	NaN	1.81754e+08	NaN	NaN		45	1.22534e+08	1.07841e+08	NaN	NaN	2.44704e+08	1.64293e+08	NaN	NaN	4.27722e+08	1.7563e+08	1.49534e+08	NaN
46	NaN	3.16614e+08	2.10169e+08	1.75562e+08	1.93655e+08	1.70865e+08	1.84308e+08	NaN	2.54402e+08	NaN	NaN	1.83122e+08	NaN	NaN		46	NaN	1.16324e+08	NaN	NaN	2.18558e+08	NaN	NaN	2.9725e+08	3.93191e+08	1.63734e+08	1.39523e+08	NaN
47	NaN	2.88017e+08	2.09458e+08	1.92263e+08	1.81455e+08	1.88897e+08	2.13877e+08	NaN	2.24387e+08	NaN	NaN	1.8186e+08	NaN	NaN		47	NaN	1.1585e+08	NaN	NaN	2.41e+08	1.53022e+08	1.47009e+08	2.86724e+08	NaN	1.58865e+08	1.39009e+08	NaN
48	NaN	2.52681e+08	2.21117e+08	1.71712e+08	1.73844e+08	1.71423e+08	2.17556e+08	NaN	2.37629e+08	NaN	NaN	NaN	NaN	NaN		48	NaN	1.1568e+08	NaN	NaN	2.55159e+08	NaN	NaN	2.84201e+08	4.96594e+08	1.55241e+08	1.4223e+08	NaN
49	NaN	2.49741e+08	2.02807e+08	1.66566e+08	1.7918e+08	1.6954e+08	2.18401e+08	NaN	2.28803e+08	NaN	NaN	NaN	NaN	NaN		49	NaN	1.15136e+08	NaN	NaN	2.28962e+08	1.63634e+08	1.44467e+08	2.42472e+08	NaN	1.53194e+08	1.49149e+08	NaN
50	NaN	NaN	1.84568e+08	1.62246e+08	1.92953e+08	1.594e+08	2.13988e+08	NaN	2.25715e+08	NaN	NaN	NaN	NaN	NaN		50	NaN	1.13516e+08	NaN	NaN	2.45186e+08	1.57109e+08	1.50655e+08	2.61676e+08	NaN	1.53959e+08	NaN	NaN
51	NaN	2.19277e+08	1.87962e+08	1.75721e+08	1.76432e+08	1.70359e+08	NaN	NaN	2.13172e+08	NaN	NaN	NaN	NaN	NaN		51	NaN	1.14632e+08	NaN	NaN	2.24611e+08	1.66811e+08	1.55014e+08	2.53181e+08	NaN	1.34102e+08	NaN	NaN
52	NaN	1.99675e+08	1.82602e+08	1.6312e+08	1.79608e+08	NaN	NaN	NaN	2.31302e+08	NaN	NaN	NaN	NaN	NaN		52	NaN	1.16308e+08	NaN	NaN	2.3192e+08	1.48868e+08	NaN	2.47886e+08	NaN	1.33922e+08	NaN	NaN
53	NaN	1.93544e+08	1.65465e+08	1.62401e+08	1.7606e+08	1.92818e+08	NaN	NaN	2.38652e+08	NaN	NaN	NaN	NaN	NaN		53	NaN	1.15607e+08	NaN	NaN	NaN	NaN	NaN	2.28002e+08	NaN	1.40761e+08	NaN	NaN
54	NaN	1.94084e+08	1.72905e+08	1.63733e+08	NaN	1.59747e+08	NaN	NaN	2.40835e+08	NaN	NaN	NaN	NaN	NaN		54	NaN	1.13457e+08	NaN	NaN	2.47715e+08	1.55847e+08	NaN	2.48097e+08	NaN	1.3899e+08	NaN	NaN
3D	Vm CTR																Vm MD
Time	Cell_1	Cell_2	Cell_3	Cell_4	Cell_5	Cell_6	Cell_7	Cell_8	Cell_9	Cell_10	Cell_11	Cell_12	Cell_13	Cell_14		Time	Cell_1	Cell_2	Cell_3	Cell_4	Cell_5	Cell_6	Cell_7	Cell_8	Cell_9	Cell_10	Cell_11	Cell_12
-10	0.0650707	0.0659448	0.0649724	0.0667434	0.0677043	0.0647637	0.0626331	NaN	0.0613599	NaN	0.0674123	0.0582066	0.071041	NaN		-10	0.0657896	0.0630549	0.058796	0.0698782	0.0696766	0.0619175	0.0724853	0.0609548	0.073395	0.0681232	0.0625151	0.0749275
-9	0.0644491	0.0661366	0.0646146	0.0663069	0.0681748	0.0661581	0.0624898	NaN	0.0622077	NaN	0.0667075	0.0574732	0.0703009	NaN		-9	0.0649714	0.0656045	0.0584395	0.0686845	0.0705135	0.0624709	0.0726447	0.0637631	0.0735984	0.0648232	0.0632514	0.0751967
-8	0.0641806	0.0660331	0.0659515	0.0659431	0.0668666	0.065596	0.0637075	0.0570832	0.0595702	0.0650281	0.0664975	0.0580302	0.0716004	0.0701249		-8	0.0663167	0.0636214	0.0598487	0.0699077	0.070673	0.0624467	0.0740974	0.0627501	0.0730091	0.062216	0.06623	0.0752109
-7	0.0629801	0.0666496	0.0655858	0.0653907	0.067052	0.0657114	0.0623295	0.0571871	0.0621897	0.0648435	0.0657581	0.0564781	0.0706498	0.0701519		-7	0.0677385	0.0647592	0.0583015	0.0683126	0.0712161	0.0624717	0.0748894	0.0591349	0.0605341	0.0611388	0.0673358	0.0742563
-6	0.0634764	0.0669772	0.0655412	0.0655143	0.0666601	0.0666351	0.0630756	0.0557129	0.0624307	0.0653105	0.0671649	0.0577093	0.070823	0.0694171		-6	0.0687789	0.0653093	0.0587768	0.068783	0.0698901	0.0622505	0.0756414	0.0640121	0.0739431	0.062633	0.0667381	0.0747015
-5	0.0636362	0.0669588	0.0663753	0.0653874	0.0658947	0.0657391	0.062617	0.0576781	0.0592772	0.064613	0.0653893	0.057023	0.0718483	0.0707081		-5	0.0681064	0.0635618	0.0584421	0.0690347	0.0696826	0.0621838	0.0769312	0.0650197	0.0722503	0.0611256	0.0676617	0.0755639
-4	0.0629057	0.0677989	0.0660275	0.0644107	0.0660781	0.0649419	0.0617985	0.0570318	0.0607973	0.0646893	0.0653644	0.0575814	0.0710744	0.0707425		-4	0.0687866	0.0640113	0.0593492	0.0691342	0.0699864	0.0630598	0.0774839	0.0629369	0.0731268	0.0599906	0.0669266	0.0746112
-3	0.0640278	0.0675166	0.0657563	0.0655555	0.0663745	0.0660443	0.0622012	0.0554183	0.0591482	0.0639913	0.0646046	0.0560552	0.0723781	0.0725724		-3	0.0690662	0.0617427	0.058367	0.0693582	0.0695471	0.0642123	0.0774889	0.063952	0.0729563	0.0645063	0.0667479	0.0739569
-2	0.0637172	0.0676349	0.0666138	0.0673312	0.0668149	0.0668821	0.0626794	0.0554322	0.0605137	0.0639644	0.0644064	0.0560432	0.0726798	0.0734892		-2	0.0693022	0.0601306	0.0593205	0.0694563	0.0699351	0.0653149	0.0782808	0.0647891	0.0740809	0.0651441	0.0672999	0.073352
-1	0.0634895	0.0671445	0.0654425	0.066801	0.0670208	0.065909	0.0624065	0.056568	0.0575324	0.0650855	0.0655231	0.0566583	0.0722621	0.0745097		-1	0.0685188	0.0588423	0.0587159	0.0684274	0.0695369	0.0641207	0.0787268	0.0641338	0.0736722	0.0645235	0.0665502	0.0748747
15	0.0676618	0.067084	0.0637484	0.0689238	NaN	0.066341	0.0604542	NaN	0.0589674	0.0644959	0.0665949	0.0673671	0.0727185	0.0764413		15	0.0668168	0.0696358	0.0616516	0.0705948	0.0656124	0.0609862	0.0794277	0.0650997	0.0739496	0.0677022	0.066953	0.0736685
16	0.0671329	0.0673192	0.0624701	0.0686184	0.0665482	0.0661032	0.0597736	0.058346	0.0595205	0.0653174	0.065267	0.0668368	0.0731119	0.0761707		16	0.0686237	0.0687364	0.0613656	0.0696715	0.0661312	0.0623428	0.0795251	0.0642219	0.0722255	0.0665741	0.0672803	0.0729259
17	0.0666415	0.0668506	0.0627267	0.0686233	0.0665321	0.0671635	0.059473	0.0576405	0.0608356	0.0641769	0.0671025	0.0668832	NaN	0.0762959		17	0.0692655	0.0697417	0.0610496	0.0703462	0.0670378	0.0614871	0.0798524	0.0636401	0.0716153	0.0663259	0.0676663	0.0746139
18	0.0673659	0.0672007	0.0628493	0.068421	0.0672634	0.0669028	0.0593505	0.0566181	0.0594779	0.0647626	0.0675925	0.0667408	0.0731284	0.0758424		18	0.069474	0.0693095	0.0627162	0.070255	0.0667759	0.0618074	0.0804123	0.0650759	0.0703678	0.0669868	0.0669613	0.0757457
19	0.0679102	0.0667352	0.0623193	0.0680137	0.0664038	0.0676364	0.0605648	0.0579836	0.0581197	0.0650047	0.0673945	0.0667834	0.073458	NaN		19	0.0684185	0.0694941	0.0621989	0.0709893	0.0680115	0.0576063	0.0798706	0.0647416	0.0727685	0.0656366	NaN	0.0735932
20	0.0674707	0.0666902	0.0621975	0.0680186	0.0663545	0.0664076	0.0580639	0.0561276	0.0579398	0.0652027	0.0672484	0.0665886	0.0735844	0.0757695		20	0.0676544	0.0689464	0.0620068	0.0699568	0.0675607	0.0613051	0.0801116	0.0635324	0.0722665	0.0657812	0.0671777	0.0735745
21	0.066881	0.0667639	0.0612606	0.0686025	0.066416	0.0666964	0.058406	NaN	0.0599039	0.0640223	0.0670153	0.06618	0.0728001	0.0756062		21	0.0687279	0.0688971	0.0620138	0.070956	0.0673798	0.0621523	0.0800354	0.0641751	0.0728014	0.0672384	0.0674187	0.073758
22	0.0675116	0.0662321	0.0621892	0.0678866	0.0655086	0.0674386	0.0609578	0.0564738	0.0590175	0.0646515	0.0676441	0.0660807	0.0744189	0.0754114		22	0.067631	0.0689449	0.0620436	0.0696962	0.0685607	0.0614195	0.0811022	0.0643596	0.0717574	0.0671088	0.0672792	0.0730859
23	0.0666039	0.0661793	0.0611637	0.0680727	0.0669622	0.0665679	0.059745	NaN	0.0592119	0.0646627	0.0670578	0.0659716	0.0740165	NaN		23	0.0686738	0.0684972	0.0616797	0.0697149	0.0657586	0.0621307	0.0803032	0.0635329	0.0709169	0.0677012	0.0676331	0.0737323
24	0.0674606	0.0660787	0.0602661	0.0677289	0.0659917	0.0671367	0.0597606	0.0558251	0.0576921	0.0651438	0.0670563	0.0662722	0.0734729	NaN		24	0.065944	0.0677907	0.0588704	0.0682442	0.0672888	0.0616989	0.0805638	0.0637569	0.0703817	0.067079	0.0674765	0.0726085
25	0.0673858	0.0656059	0.0614469	0.0678579	0.0658537	0.0669532	0.058288	NaN	0.0585348	NaN	0.0671007	0.0670718	0.0737841	NaN		25	0.0662995	0.0679968	0.0598672	0.0665938	0.0683904	0.0625011	0.08027	0.0634261	0.0699841	0.0670682	0.0672984	0.0730933
26	0.0663479	0.0659249	0.0623901	0.0682054	0.0660349	0.0666324	0.0603905	0.0555328	0.0588779	NaN	0.0674532	0.0666342	0.073547	NaN		26	0.0657318	0.0686162	0.0599705	NaN	NaN	0.0619462	0.080494	0.0646311	0.0734129	0.0673935	0.0671114	0.0725636
27	0.0677636	0.0657146	0.061147	0.0679166	0.066613	0.06661	0.0593816	0.0551366	0.0581082	0.065727	0.0673905	0.0666035	0.0734367	NaN		27	0.0665592	0.0683239	0.0593984	NaN	0.0645926	0.0615993	0.0799344	0.0650055	0.0745499	0.0681897	0.0671443	0.0732777
28	0.0682539	0.066048	0.0630964	0.0685728	0.0654476	0.0661183	0.0595928	NaN	0.0587657	0.0655527	0.0671501	0.0670642	0.0732188	NaN		28	0.0638571	0.0679403	0.0593618	0.0679381	NaN	0.0625172	0.0805038	0.0635357	0.0733946	0.0680327	0.0670757	0.072216
29	0.0677961	0.0663545	0.060934	0.0682091	0.0654147	0.0655813	0.0592344	NaN	0.0604024	0.0637987	0.0677725	0.0663183	0.0729517	NaN		29	0.0668123	0.0674683	0.0593832	0.0696706	0.067507	0.0603157	0.080672	0.0638615	0.0720624	0.066651	0.0673897	0.072693
30	0.0678695	0.065818	0.0609477	0.0669335	0.0660885	0.0664732	0.0592134	NaN	0.0561913	0.0639646	0.0681691	0.0671412	NaN	NaN		30	0.0634801	0.067147	0.0607008	0.0678687	0.0689517	0.0613101	0.0800152	0.0642986	0.0736288	0.067603	0.0673239	0.0725007
31	0.0678025	0.0654782	0.0613278	0.0670978	0.0657254	0.0666925	0.0582603	NaN	0.0592821	NaN	0.0677713	0.0667008	0.072503	NaN		31	0.0623167	0.0670963	0.0598214	0.0698853	0.0697278	0.0605465	0.0798053	0.0630547	0.0733881	0.0679192	NaN	0.0725804
32	0.0673801	0.0643157	0.0621576	0.0671667	0.0667601	0.0667517	0.0592461	0.0558222	0.0597275	NaN	NaN	0.0665266	0.0730319	NaN		32	0.062962	0.0671386	0.0605966	0.0697599	NaN	0.061025	0.0795979	0.0636697	0.0736642	0.0683205	0.0668732	0.0731735
33	0.0673631	0.0643858	0.0610735	0.0677609	0.0667352	0.0655342	0.0592324	0.0566392	0.0594481	0.0651039	0.0698899	0.0676777	NaN	NaN		33	0.061791	0.066766	0.0612712	0.0675683	NaN	NaN	0.0801194	0.0644302	0.072257	0.0673753	0.0679762	0.0729819
34	0.0682698	0.0654661	0.0612717	0.0676191	NaN	0.0664823	0.0591461	0.0566193	0.0597549	NaN	0.0692214	0.0672955	0.0736595	NaN		34	0.0603933	0.0673349	0.0612873	0.0670133	0.0680486	NaN	NaN	0.0635679	0.0726117	0.066632	0.0679445	0.0733111
35	0.0684566	0.0661505	0.063928	0.0670901	0.0651638	0.0655534	0.0571479	0.0556358	0.059416	NaN	0.06946	0.0673114	NaN	NaN		35	0.0606105	0.0673442	0.0621373	NaN	0.0691293	NaN	0.0803785	0.0639002	0.0732562	0.0674515	0.0679758	0.0721668
36	0.0687809	0.0659473	0.0635198	0.0673931	0.0658646	0.0652173	0.0582496	NaN	0.0576191	NaN	0.069936	0.0677487	0.0722093	NaN		36	0.0600792	0.0678103	0.0618094	0.0685955	0.0677032	NaN	0.0794456	0.0642495	0.0719666	0.0676547	0.0679092	NaN
37	0.0691293	0.0676676	0.0650762	0.0674447	0.0660062	0.0658631	0.0584291	NaN	0.059158	0.0668927	0.0706231	0.0671352	0.0726297	NaN		37	0.0596272	0.0669541	0.0612005	0.0684528	0.0691107	NaN	0.0801495	0.0636319	0.0703711	0.0656355	0.0682191	NaN
38	0.0694306	0.0688781	0.0664631	0.0683921	0.0665401	0.0651362	0.0589104	NaN	0.060243	0.06688	0.0702647	0.0678276	NaN	NaN		38	0.0588916	0.0667705	0.0617833	NaN	0.0685991	0.059925	0.0806188	0.0625478	0.0728827	0.0675227	0.0688232	0.0717139
39	0.070816	0.0683353	0.0671994	0.0686122	0.0662109	0.0663824	0.0599532	NaN	0.058808	0.0672603	0.0705051	0.0678124	NaN	NaN		39	0.0574416	0.066758	0.0623357	NaN	0.0687007	0.0602397	0.0805754	0.0634179	0.0712744	0.0667121	0.0682986	0.0716431
40	0.0705182	0.0684734	0.0683621	0.0691	0.0660967	0.0654486	0.0597239	NaN	0.0577354	NaN	0.0704785	0.067574	NaN	NaN		40	0.0560561	0.0670348	0.0623382	0.0695062	0.0691706	0.0603696	NaN	0.0622385	0.0714451	0.0678476	0.0679312	0.0721129
41	0.0706264	0.0685305	0.0688374	0.0689533	0.0661802	NaN	0.0593148	NaN	0.059614	0.0666576	0.0702213	0.0675611	NaN	NaN		41	0.05502	0.0670276	0.0622605	0.0676473	0.0694154	0.0598054	NaN	0.0638708	0.0682553	0.0697587	0.0686082	0.071888
42	0.0713274	0.0689651	0.0689775	0.0695392	0.0672083	NaN	0.0590294	NaN	0.0592553	0.066739	0.0705542	0.0674426	NaN	NaN		42	0.0565162	0.067631	NaN	NaN	0.0694338	0.0595393	0.0798218	0.0634289	0.0705718	0.0691126	0.0683891	0.0711646
43	0.0722354	0.0695214	0.0688662	0.0701694	0.0663652	0.0641845	0.0601017	NaN	0.0601707	NaN	NaN	0.0637776	NaN	NaN		43	0.0574541	0.067717	NaN	NaN	0.0688765	0.0604912	0.0798254	0.063543	0.0707855	0.0689699	0.0686042	0.071501
44	0.072457	NaN	0.0683779	0.0698001	0.0661808	NaN	0.059592	0.0551646	0.0590063	NaN	NaN	0.0665707	NaN	NaN		44	0.0584206	0.0673466	NaN	NaN	0.0683366	NaN	0.0793296	0.0640359	0.0697686	0.0674742	0.0692932	NaN
45	0.0734146	0.0686362	0.0691864	0.0703387	0.0665475	NaN	0.059159	NaN	0.0592279	NaN	NaN	0.0671373	NaN	NaN		45	0.0566046	0.0680225	NaN	NaN	0.0692388	0.0594344	NaN	NaN	0.0697526	0.0687985	0.0684913	NaN
46	NaN	0.0683989	0.0683924	0.0701038	0.0667924	0.0636871	0.0610193	NaN	0.0574565	NaN	NaN	0.0671719	NaN	NaN		46	NaN	0.0681257	NaN	NaN	0.0690434	NaN	NaN	0.0632132	0.069708	0.0692763	0.0691159	NaN
47	NaN	0.068448	0.0678428	0.0704218	0.0663755	0.0623231	0.0586765	NaN	0.0595148	NaN	NaN	0.0668933	NaN	NaN		47	NaN	0.0675458	NaN	NaN	0.0687192	0.0587355	0.0796658	0.0646914	NaN	0.0703213	0.0691329	NaN
48	NaN	0.0700487	0.0676784	0.0710723	0.0663209	0.0635073	0.0583938	NaN	0.0598101	NaN	NaN	NaN	NaN	NaN		48	NaN	0.0673208	NaN	NaN	0.0689456	NaN	NaN	0.0649423	0.0686686	0.0721144	0.0687239	NaN
49	NaN	0.0702314	0.0681256	0.0704476	0.0667765	0.0631542	0.0587238	NaN	0.0586816	NaN	NaN	NaN	NaN	NaN		49	NaN	0.0674367	NaN	NaN	0.0685267	0.0576431	0.0789862	0.0653859	NaN	0.0731673	0.0686379	NaN
50	NaN	NaN	0.0691768	0.0697292	0.0656984	0.0639935	0.0591556	NaN	0.0604254	NaN	NaN	NaN	NaN	NaN		50	NaN	0.0683018	NaN	NaN	0.0689983	0.0579581	0.0792002	0.065942	NaN	0.0715892	NaN	NaN
51	NaN	0.0705761	0.0697326	0.0703171	0.0663177	0.063041	NaN	NaN	0.0597222	NaN	NaN	NaN	NaN	NaN		51	NaN	0.0676755	NaN	NaN	0.0686033	0.0577533	0.079033	0.0662244	NaN	0.0731983	NaN	NaN
52	NaN	0.0711139	0.0691616	0.0701358	0.0656338	NaN	NaN	NaN	0.0585731	NaN	NaN	NaN	NaN	NaN		52	NaN	0.0674779	NaN	NaN	0.0695915	0.0594934	NaN	0.0656897	NaN	0.0730963	NaN	NaN
53	NaN	0.0714912	0.0703123	0.0708599	0.0657103	0.0612964	NaN	NaN	0.0574914	NaN	NaN	NaN	NaN	NaN		53	NaN	0.0671754	NaN	NaN	NaN	NaN	NaN	0.0661202	NaN	0.0729594	NaN	NaN
54	NaN	0.0721227	0.070032	0.0705191	NaN	0.0634834	NaN	NaN	0.0588636	NaN	NaN	NaN	NaN	NaN		54	NaN	0.0672051	NaN	NaN	0.0686986	0.0578906	NaN	0.066057	NaN	0.0728259	NaN	NaN
