# Supplementary material for: Sensory experience inversely regulates feedforward and feedback excitation-inhibition ratio in rodent visual cortex
Source: eLife. 2018 Oct 12;7:e38846. doi: 10.7554/eLife.38846 (PMC6224193; doi:10.7554/eLife.38846)
Supplement: Figure 4—source data 1. [file elife-38846-fig4-data1.xlsx]

## Sheet: Sheet1
Figure 4 Main Figure								Supplemental
	4D			4F				4_S1B
	PV Charge	PYR Charge		Cell #	CTR Ratio	MD Ratio		Stim intensity	Spikes PYR	Spikes PV
	7.21882e-12	1.92886e-12		1	0.206454	0.438603		0.00998389	0	0
	8.62414e-12	2.90106e-12		2	0.270522	0.323238		0.0101557	0	0
	8.36428e-12	2.17668e-12		3	0.50394	0.285591		0.0103305	0	0
	7.07085e-12	1.9564e-12		4	0.234069	0.742612		0.0105082	0	0
	6.89727e-12	1.90841e-12		5	0.301407	0.555821		0.0106891	0	0
	1.71343e-11	5.36373e-12		6	0.365344	0.484964		0.010873	0	0
	1.32334e-11	3.99118e-12		7	0.196636	0.293371		0.0110601	0	0
	1.09549e-11	3.47228e-12		8	0.176294	0.313258		0.0112505	0	0
	1.12771e-11	3.40581e-12		9	0.257951	0.365796		0.0114441	0	0
	1.06548e-11	3.25997e-12		10	0.295739	0.445188		0.011641	0	0
	9.61184e-12	2.63297e-12		11	0.250262	0.228743		0.0118413	0	0
	8.79667e-12	2.53737e-12		12	0.200486	0.231665		0.0120451	0	0
	1.02337e-11	4.31488e-12		13	0.122168	0.303498		0.0122524	0	0
	6.6448e-12	2.75131e-12		14		0.320939		0.0124632	0	0
	8.15065e-12	2.43517e-12		15		0.237152		0.0126777	0	0
				16		0.32535		0.0128959	0	0
								0.0131178	0	0
								0.0133435	0	0
								0.0135731	0	0
								0.0138067	0	0
								0.0140443	0	0
								0.014286	0	0
								0.0145318	0	0
								0.0147819	0	0
								0.0150363	0	0
								0.015295	0	0
								0.0155582	0	0
								0.015826	0	0
								0.0160983	0	0
								0.0163753	0	0
								0.0166571	0	0
								0.0169438	0	0
								0.0172353	0	0
								0.0175319	0	0
								0.0178336	0	0
								0.0181405	0	0
								0.0184527	0	0
								0.0187702	0	0
								0.0190933	0	0
								0.0194218	0	0
								0.019756	0	0
								0.020096	0	0
								0.0204418	0	0
								0.0207936	0	0
								0.0211514	0	0
								0.0215154	0	0
								0.0218857	0	0
								0.0222623	0	0
								0.0226454	0	0
								0.0230351	0	0
								0.0234315	0	0
								0.0238347	0	0
								0.0242449	0	0
								0.0246621	0	0
								0.0250865	0	0
								0.0255182	0	0
								0.0259573	0	0
								0.026404	0	0
								0.0268584	0	0
								0.0273206	0	0
								0.0277907	0	0
								0.028269	0	0
								0.0287554	0	0
								0.0292503	0	0
								0.0297536	0	0
								0.0302656	0	0
								0.0307865	0	0
								0.0313163	0	0
								0.0318552	0	0
								0.0324034	0	0
								0.032961	0	0
								0.0335282	0	0
								0.0341052	0	0
								0.0346921	0	0
								0.0352891	0	0
								0.0358963	0	0
								0.036514	0	0
								0.0371424	0	0
								0.0377816	0	0
								0.0384317	0	0
								0.0390931	0	0.166667
								0.0397658	0	0.166667
								0.0404501	0	0.166667
								0.0411462	0	0.166667
								0.0418543	0	0.166667
								0.0425745	0	0.166667
								0.0433072	0	0.166667
								0.0440524	0	0.166667
								0.0448105	0	0.166667
								0.0455816	0	0.166667
								0.046366	0	0.0555556
								0.0471639	0	0.0555556
								0.0479756	0	0.0555556
								0.0488011	0	0.0555556
								0.0496409	0	0.0555556
								0.0504952	0	0.0555556
								0.0513641	0	0.0555556
								0.052248	0	0.0555556
								0.0531472	0	0.0555556
								0.0540617	0	0.0555556
								0.0549921	0	0.0833333
								0.0559384	0	0.0833333
								0.056901	0	0.0833333
								0.0578802	0	0.0833333
								0.0588762	0	0.0833333
								0.0598894	0	0.0833333
								0.06092	0	0.0833333
								0.0619684	0	0.0833333
								0.0630347	0	0.0833333
								0.0641195	0	0.0833333
								0.0652229	0	0.333333
								0.0663453	0	0.333333
								0.067487	0	0.333333
								0.0686483	0	0.333333
								0.0698297	0	0.333333
								0.0710313	0	0.333333
								0.0722537	0	0.333333
								0.0734971	0	0.333333
								0.0747618	0	0.333333
								0.0760484	0	0.333333
								0.0773571	0	0.333333
								0.0786883	0	0.333333
								0.0800424	0	0.333333
								0.0814198	0	0.333333
								0.0828209	0	0.333333
								0.0842461	0	0.333333
								0.0856959	0	0.333333
								0.0871706	0	0.333333
								0.0886707	0	0.333333
								0.0901966	0	0.333333
								0.0917487	0	0.333333
								0.0933276	0	0.333333
								0.0949336	0	0.333333
								0.0965673	0	0.333333
								0.0982291	0	0.333333
								0.0999194	0	0.333333
								0.101639	0	0.333333
								0.103388	0	0.333333
								0.105167	0	0.333333
								0.106977	0	0.333333
								0.108818	0	0.5
								0.11069	0	0.5
								0.112595	0	0.5
								0.114533	0	0.5
								0.116504	0	0.5
								0.118509	0	0.5
								0.120548	0	0.5
								0.122622	0	0.5
								0.124733	0	0.5
								0.126879	0	0.5
								0.129062	0	0.5
								0.131283	0	0.5
								0.133543	0	0.5
								0.135841	0	0.5
								0.138178	0	0.5
								0.140556	0	0.5
								0.142975	0	0.5
								0.145435	0	0.5
								0.147938	0	0.5
								0.150484	0	0.5
								0.153073	0	0.75
								0.155708	0	0.75
								0.158387	0	0.75
								0.161113	0	0.75
								0.163885	0	0.75
								0.166706	0	0.75
								0.169574	0	0.75
								0.172492	0	0.75
								0.175461	0	0.75
								0.17848	0	0.75
								0.181552	0	0.75
								0.184676	0	0.75
								0.187854	0	0.75
								0.191086	0	0.75
								0.194375	0	0.75
								0.19772	0	0.75
								0.201122	0	0.75
								0.204583	0	0.75
								0.208104	0	0.75
								0.211685	0	0.75
								0.215328	0	1
								0.219033	0	1
								0.222802	0	1
								0.226637	0	1
								0.230537	0	1
								0.234504	0	1
								0.238539	0	1
								0.242644	0	1
								0.24682	0	1
								0.251067	0	1
								0.255388	0	1.38889
								0.259783	0	1.38889
								0.264253	0	1.38889
								0.2688	0	1.38889
								0.273426	0	1.38889
								0.278131	0	1.38889
								0.282918	0	1.38889
								0.287786	0	1.38889
								0.292739	0	1.38889
								0.297776	0	1.38889
								0.302901	0	1.8
								0.308113	0	1.8
								0.313415	0	1.8
								0.318809	0	1.8
								0.324295	0	1.8
								0.329875	0	1.8
								0.335552	0	1.8
								0.341326	0	1.8
								0.3472	0	1.8
								0.353175	0	1.8
								0.359253	0	1.58333
								0.365435	0	1.58333
								0.371723	0	1.58333
								0.37812	0	1.58333
								0.384627	0	1.58333
								0.391246	0	1.58333
								0.397979	0	1.58333
								0.404827	0	1.58333
								0.411794	0	1.58333
								0.41888	0	1.58333
								0.426089	0.0833333	1.58333
								0.433421	0.0833333	1.58333
								0.44088	0.0833333	1.58333
								0.448466	0.0833333	1.58333
								0.456184	0.0833333	1.58333
								0.464034	0.0833333	1.58333
								0.47202	0.0833333	1.58333
								0.480142	0.0833333	1.58333
								0.488405	0.0833333	1.58333
								0.49681	0.0833333	1.58333
								0.505359	0.0555556	1.66667
								0.514055	0.0555556	1.66667
								0.522902	0.0555556	1.66667
								0.5319	0.0555556	1.66667
								0.541053	0.0555556	1.66667
								0.550364	0.0555556	1.66667
								0.559835	0.0555556	1.66667
								0.569469	0.0555556	1.66667
								0.579269	0.0555556	1.66667
								0.589237	0.0555556	1.66667
								0.599377	0.0555556	1.66667
								0.609691	0.0555556	1.66667
								0.620183	0.0555556	1.66667
								0.630856	0.0555556	1.66667
								0.641712	0.0555556	1.66667
								0.652755	0.0555556	1.66667
								0.663988	0.0555556	1.66667
								0.675414	0.0555556	1.66667
								0.687037	0.0555556	1.66667
								0.69886	0.0555556	1.66667
								0.710886	0.166667	1.66667
								0.723119	0.166667	1.66667
								0.735563	0.166667	1.66667
								0.748221	0.166667	1.66667
								0.761097	0.166667	1.66667
								0.774194	0.166667	1.66667
								0.787517	0.166667	1.66667
								0.801069	0.166667	1.66667
								0.814854	0.166667	1.66667
								0.828877	0.166667	1.66667
								0.843141	0.277778	1.94444
								0.85765	0.277778	1.94444
								0.872409	0.277778	1.94444
								0.887422	0.277778	1.94444
								0.902693	0.277778	1.94444
								0.918227	0.277778	1.94444
								0.934028	0.277778	1.94444
								0.950101	0.277778	1.94444
								0.966451	0.277778	1.94444
								0.983083	0.277778	1.94444
								1	0.333333	2.21242
