# Supplementary material for: Sensory experience inversely regulates feedforward and feedback excitation-inhibition ratio in rodent visual cortex
Source: eLife. 2018 Oct 12;7:e38846. doi: 10.7554/eLife.38846 (PMC6224193; doi:10.7554/eLife.38846)
Supplement: Figure 5—source data 1. [file elife-38846-fig5-data1.xlsx]

## Sheet: Sheet1
Figure 5
5B				5C							5E				5F
Current (pA)	PV Firing CTR	PV Firing MD		Cell #	Rin PV CTR	Rin PV MD		Rheobase CTR	Rheobase MD		Current (pA)	PYR Firing CTR	PYR Firing MD		Cell #	Rin PYR CTR	Rin PYR MD		Rheobase CTR	Rheobase MD
0	0	0		1	1.18864e+08	9.09164e+07		240	340		0	0	0		1	1.36389e+08	1.50421e+08		40	80
20	0	0		2	1.02477e+08	7.09229e+07		200	340		20	0	0		2	3.52607e+08	1.29622e+08		40	60
40	0	0		3	1.65514e+08	1.02166e+08		560	340		40	1	0.818182		3	4.02286e+08	1.60829e+08		40	40
60	0	0		4	6.59845e+07	8.90548e+07		240	340		60	3.46154	2.90909		4	2.10114e+08	1.34779e+08		80	180
80	0	0		5	1.29486e+08	1.14115e+08		500	180		80	7	6.63636		5	3.05467e+08	3.1261e+08		60	60
100	0	0		6	6.79976e+07	1.06039e+08		120	160		100	10.3077	10.8182		6	1.6318e+08	1.91525e+08		120	80
120	0.208333	0		7	1.60209e+08	1.00559e+08		140	200		120	13.2308	13.0909		7	2.25142e+08	1.78389e+08		80	80
140	1.66667	0		8	1.70337e+08	1.45133e+08		400	500		140	15.6154	14.8182		8	2.78819e+08	2.18625e+08		60	60
160	2.66667	0.04		9	8.26562e+07	1.38853e+08		320	280		160	17.6923	16.8182		9	1.90398e+08	2.83768e+08		100	40
180	3.41667	0.52		10	8.42677e+07	6.48304e+07		400	420		180	19.5385	19.4545		10	2.35424e+08	1.99116e+08		40	140
200	6.79167	3.28		11	1.00268e+08	1.13035e+08		200	540		200	20.6154	21.3636		11	2.40799e+08	3.05657e+08		80	40
220	8.04167	6.52		12	1.40785e+08	1.11857e+08		300	240		220	22.3846	23.4545		12	1.5979e+08			100
240	11.4167	9.72		13	1.09604e+08	7.11171e+07		320	420		240	24.1538	23.125		13	1.65131e+08			100
260	14.7917	14.24		14	9.70946e+07	1.08238e+08		420	200		260	23.75	25.25
280	21.3333	19.92		15	6.95156e+07	8.64265e+07		380	240		280	24	26.7143
300	25.3333	24		16	9.30404e+07	1.16036e+08		360	420		300	26.4	27
320	32.625	28.64		17	9.07344e+07	1.29363e+08		260	420
340	39.5	32.88		18	1.16306e+08	7.99781e+07		320	300
360	44	37.28		19	1.01146e+08	9.70101e+07		440	400
380	51.125	46.12		20	7.76522e+07	1.03548e+08		260	300
400	57.4583	52.56		21	1.39148e+08	8.39075e+07		260	400
420	70.2083	64.88		22	8.19143e+07	1.13911e+08		420	480
440	80.0833	73.44		23	1.03115e+08	7.8182e+07		380	280
460	88.0417	82.4		24	9.21975e+07	1.44973e+08		380	460
480	95.3043	88.48		25		1.24477e+08			200
500	104.292	95.84
600	136.333	126.64
700	168.182	150.64
800	194.318	169.048
