# Supplementary material for: Sensory experience inversely regulates feedforward and feedback excitation-inhibition ratio in rodent visual cortex
Source: eLife. 2018 Oct 12;7:e38846. doi: 10.7554/eLife.38846 (PMC6224193; doi:10.7554/eLife.38846)
Supplement: Figure 6—source data 1. [file elife-38846-fig6-data1.xlsx]

## Sheet: Sheet1
Figure 6
6D								6E
%	CTR cumhist	MD cumhist		Time (ms)	WavAvg CTR	WavAvg MD		Cell #	CTR Amp.	MD Amp.
0	0	0		0	-2.59556e-13	-1.29866e-13		1	1.44636e-10	3.43359e-10
0	6.12718e-12	6.70443e-12		0.1	-1.14694e-13	-9.94103e-14		2	5.61899e-11	6.42316e-10
1	6.36636e-12	6.96278e-12		0.2	-1.38991e-13	3.78112e-14		3	1.17934e-10	8.97142e-11
2	7.26989e-12	8.65641e-12		0.3	-1.04779e-14	6.70632e-14		4	3.87216e-10	1.79891e-10
3	8.47374e-12	1.00812e-11		0.4	-8.91219e-14	-7.35767e-14		5	3.53796e-10	8.09569e-10
4	9.36431e-12	1.11872e-11		0.5	-2.751e-13	6.3407e-14		6	5.40701e-11	2.11205e-10
5	9.43704e-12	1.14529e-11		0.6	-4.532e-13	1.83304e-14		7	2.86393e-11	1.32046e-10
6	9.62295e-12	1.15039e-11		0.7	-4.02943e-13	1.1477e-13		8	4.27055e-10	1.08703e-10
7	1.03572e-11	1.21989e-11		0.8	-3.81432e-13	2.12158e-13		9	2.31408e-10	9.8737e-11
8	1.19458e-11	1.30914e-11		0.9	-3.39605e-13	2.11095e-13		10	5.99601e-10	1.09421e-10
9	1.5346e-11	1.43162e-11		1	-3.08668e-13	1.67999e-13		11	7.35048e-11	3.42797e-10
10	1.79571e-11	1.54256e-11		1.1	-1.3875e-13	9.01735e-14		12	1.42142e-10	6.01613e-11
11	1.93466e-11	1.64801e-11		1.2	-6.11221e-14	9.0511e-14		13	1.6248e-10	2.5907e-10
12	2.0315e-11	1.66737e-11		1.3	-2.30138e-13	1.48337e-13		14	1.52228e-10	4.10854e-11
13	2.11733e-11	1.7741e-11		1.4	-7.88202e-14	1.13891e-13		15	8.34131e-11	1.21764e-10
14	2.19421e-11	2.10038e-11		1.5	-1.13173e-13	9.71859e-14		16	1.37984e-10	2.80322e-10
15	2.29717e-11	2.38449e-11		1.6	2.18489e-13	1.77289e-13		17	6.21929e-11	9.29266e-11
16	2.60768e-11	2.63968e-11		1.7	1.17319e-13	3.30483e-13		18	1.02915e-11	7.43455e-11
17	3.04628e-11	2.98863e-11		1.8	2.92492e-13	1.96493e-13		19	3.02853e-10	9.57499e-12
18	3.11538e-11	3.30233e-11		1.9	3.3267e-13	1.10288e-13		20	7.57896e-11	4.11054e-10
19	3.24405e-11	3.43637e-11		2	3.45848e-13	5.26182e-14		21	2.61283e-10	1.2547e-10
20	3.42449e-11	3.68048e-11		2.1	4.63791e-13	1.8377e-13		22	5.5985e-10	9.32146e-11
21	3.69131e-11	4.03099e-11		2.2	5.26758e-13	4.00525e-13		23	5.57754e-10	1.42825e-10
22	3.78082e-11	4.10219e-11		2.3	9.2114e-13	6.94898e-13		24	4.57662e-11	2.18711e-10
23	3.82339e-11	4.12573e-11		2.4	1.17592e-12	1.06289e-12		25	3.25676e-10	2.90237e-10
24	4.01196e-11	4.27065e-11		2.5	2.82227e-12	2.93132e-12		26	1.35518e-10	4.26042e-11
25	4.28999e-11	4.37175e-11		2.6	8.31576e-12	9.38207e-12		27	4.51811e-11	1.09516e-10
26	4.71627e-11	4.41325e-11		2.7	2.70788e-11	2.94822e-11		28	1.0459e-10	6.70443e-12
27	5.46487e-11	4.46832e-11		2.8	6.53531e-11	6.85275e-11		29	1.33938e-10	4.32346e-11
28	5.79655e-11	4.52928e-11		2.9	1.13506e-10	1.17217e-10		30	5.86723e-10	9.65182e-10
29	6.00753e-11	4.61394e-11		3	1.55424e-10	1.59386e-10		31	2.19263e-10
30	6.19214e-11	4.73695e-11		3.1	1.80128e-10	1.85004e-10		32	2.39716e-10
31	6.79177e-11	4.93474e-11		3.2	1.92954e-10	1.98291e-10		33	3.78405e-10
32	7.20844e-11	5.38931e-11		3.3	1.99932e-10	2.05786e-10		34	8.65343e-11
33	7.21399e-11	5.9858e-11		3.4	2.03842e-10	2.098e-10		35	3.91975e-11
34	7.2988e-11	6.17643e-11		3.5	2.05618e-10	2.11591e-10
35	7.41902e-11	6.30434e-11		3.6	2.05888e-10	2.11731e-10
36	7.57439e-11	6.31204e-11		3.7	2.0501e-10	2.1067e-10
37	8.08211e-11	6.32001e-11		3.8	2.03656e-10	2.08984e-10
38	8.44743e-11	6.3282e-11		3.9	2.01687e-10	2.06377e-10
39	8.6541e-11	6.89298e-11		4	1.99089e-10	2.03363e-10
40	8.67713e-11	7.47986e-11		4.1	1.95807e-10	2.00073e-10
41	8.79751e-11	7.74719e-11		4.2	1.92307e-10	1.96698e-10
42	8.98348e-11	7.91543e-11		4.3	1.88791e-10	1.93134e-10
43	9.05302e-11	7.97396e-11		4.4	1.85154e-10	1.8928e-10
44	9.34554e-11	8.31648e-11		4.5	1.81533e-10	1.85287e-10
45	9.71716e-11	8.7329e-11		4.6	1.77678e-10	1.81462e-10
46	9.74697e-11	9.08054e-11		4.7	1.73787e-10	1.77626e-10
47	9.84284e-11	9.41885e-11		4.8	1.6978e-10	1.74076e-10
48	1.00355e-10	9.74255e-11		4.9	1.65902e-10	1.70125e-10
49	1.04797e-10	9.86787e-11		5	1.61899e-10	1.66189e-10
50	1.11953e-10	9.90609e-11		5.1	1.5797e-10	1.61905e-10
51	1.18728e-10	1.05173e-10		5.2	1.53966e-10	1.57946e-10
52	1.21726e-10	1.10387e-10		5.3	1.50192e-10	1.54142e-10
53	1.22766e-10	1.13553e-10		5.4	1.46397e-10	1.5052e-10
54	1.27599e-10	1.21001e-10		5.5	1.4274e-10	1.47112e-10
55	1.41425e-10	1.31183e-10		5.6	1.39192e-10	1.43891e-10
56	1.44141e-10	1.35889e-10		5.7	1.35724e-10	1.40582e-10
57	1.4661e-10	1.40802e-10		5.8	1.32277e-10	1.3721e-10
58	1.51772e-10	1.48241e-10		5.9	1.28956e-10	1.33812e-10
59	1.555e-10	1.5214e-10		6	1.25795e-10	1.30596e-10
60	1.61597e-10	1.52843e-10		6.1	1.22793e-10	1.27659e-10
61	1.70871e-10	1.57125e-10		6.2	1.19835e-10	1.24553e-10
62	1.83707e-10	1.61975e-10		6.3	1.16854e-10	1.2159e-10
63	1.96188e-10	1.65797e-10		6.4	1.13874e-10	1.18493e-10
64	2.07943e-10	1.68375e-10		6.5	1.10899e-10	1.15788e-10
65	2.10969e-10	1.69374e-10		6.6	1.08267e-10	1.13194e-10
66	2.17828e-10	1.70734e-10		6.7	1.05719e-10	1.10606e-10
67	2.27116e-10	1.72969e-10		6.8	1.03347e-10	1.07779e-10
68	2.30221e-10	1.89224e-10		6.9	1.00775e-10	1.05332e-10
69	2.34856e-10	2.02111e-10		7	9.8302e-11	1.02914e-10
70	2.41062e-10	2.08903e-10		7.1	9.59748e-11	1.00659e-10
71	2.50879e-10	2.19313e-10		7.2	9.36398e-11	9.8315e-11
72	2.59682e-10	2.31579e-10		7.3	9.12389e-11	9.61108e-11
73	2.69204e-10	2.44523e-10		7.4	8.88464e-11	9.39285e-11
74	2.83366e-10	2.5479e-10		7.5	8.64579e-11	9.15724e-11
75	3.0384e-10	2.57796e-10		7.6	8.43839e-11	8.91736e-11
76	3.22118e-10	2.68474e-10		7.7	8.23408e-11	8.7027e-11
77	3.27988e-10	2.84793e-10		7.8	8.05032e-11	8.49953e-11
78	3.3609e-10	3.01495e-10		7.9	7.87311e-11	8.30563e-11
79	3.45338e-10	3.29575e-10		8	7.69635e-11	8.10134e-11
80	3.55776e-10	4.0708e-10		8.1	7.53025e-11	7.90433e-11
81	3.93644e-10	4.60693e-10		8.2	7.35889e-11	7.72041e-11
82	4.22513e-10	4.89589e-10		8.3	7.21443e-11	7.54861e-11
83	4.29207e-10	4.96352e-10		8.4	7.05405e-11	7.3972e-11
84	4.62523e-10	4.99268e-10		8.5	6.90362e-11	7.2227e-11
85	4.83692e-10	5.18125e-10		8.6	6.74104e-11	7.05758e-11
86	4.86212e-10	5.43651e-10		8.7	6.58106e-11	6.88997e-11
87	5.03735e-10	5.78904e-10		8.8	6.42581e-11	6.76242e-11
88	5.37883e-10	6.11428e-10		8.9	6.27698e-11	6.66531e-11
89	5.86745e-10	6.42325e-10		9	6.15751e-11	6.54342e-11
90	5.87492e-10	6.42833e-10		9.1	6.02643e-11	6.41565e-11
91	5.96426e-10	6.5175e-10		9.2	5.90412e-11	6.271e-11
92	6.17998e-10	6.7837e-10		9.3	5.76934e-11	6.1444e-11
93	7.03373e-10	7.33167e-10		9.4	5.6468e-11	6.01717e-11
94	7.39383e-10	8.04718e-10		9.5	5.52707e-11	5.88366e-11
95	7.64483e-10	8.20763e-10		9.6	5.40494e-11	5.76601e-11
96	9.0356e-10	8.31507e-10		9.7	5.28612e-11	5.66483e-11
97	9.79867e-10	8.38186e-10		9.8	5.16664e-11	5.54092e-11
98	1.02013e-09	9.20564e-10		9.9	5.06225e-11	5.42563e-11
99	1.03718e-09	1.06681e-09		10	4.95809e-11	5.29637e-11
100	1.0417e-09	1.08912e-09		10.1	4.86728e-11	5.20677e-11
100	1e-09	1e-09		10.2	4.7721e-11	5.10375e-11
				10.3	4.69718e-11	5.00853e-11
				10.4	4.60182e-11	4.89842e-11
				10.5	4.51681e-11	4.79027e-11
				10.6	4.43967e-11	4.69797e-11
				10.7	4.36657e-11	4.60731e-11
				10.8	4.28999e-11	4.52657e-11
				10.9	4.19656e-11	4.42904e-11
				11	4.10529e-11	4.33783e-11
				11.1	4.02028e-11	4.23367e-11
				11.2	3.95645e-11	4.13695e-11
				11.3	3.87435e-11	4.04618e-11
				11.4	3.79492e-11	3.9605e-11
				11.5	3.71541e-11	3.89941e-11
				11.6	3.65504e-11	3.82662e-11
				11.7	3.5897e-11	3.76203e-11
				11.8	3.50314e-11	3.68347e-11
				11.9	3.44553e-11	3.61196e-11
				12	3.3874e-11	3.54113e-11
				12.1	3.33925e-11	3.47107e-11
				12.2	3.25272e-11	3.40884e-11
				12.3	3.18088e-11	3.34436e-11
				12.4	3.1213e-11	3.27944e-11
				12.5	3.0666e-11	3.22075e-11
				12.6	3.01883e-11	3.16933e-11
				12.7	2.95298e-11	3.10704e-11
				12.8	2.90226e-11	3.04516e-11
				12.9	2.84227e-11	2.98094e-11
				13	2.78705e-11	2.93202e-11
				13.1	2.7444e-11	2.87779e-11
				13.2	2.70489e-11	2.82645e-11
				13.3	2.67254e-11	2.761e-11
				13.4	2.62103e-11	2.70233e-11
				13.5	2.58172e-11	2.65998e-11
				13.6	2.52584e-11	2.62484e-11
				13.7	2.48462e-11	2.57953e-11
				13.8	2.43846e-11	2.5401e-11
				13.9	2.4069e-11	2.48398e-11
				14	2.36461e-11	2.44819e-11
				14.1	2.32525e-11	2.39198e-11
				14.2	2.30347e-11	2.38272e-11
				14.3	2.29496e-11	2.35618e-11
				14.4	2.27153e-11	2.33536e-11
				14.5	2.22782e-11	2.29867e-11
				14.6	2.19132e-11	2.2539e-11
				14.7	2.15825e-11	2.20748e-11
				14.8	2.12324e-11	2.14761e-11
				14.9	2.08828e-11	2.12237e-11
				15	2.05954e-11	2.10378e-11
				15.1	2.02524e-11	2.0905e-11
				15.2	1.99221e-11	2.07119e-11
				15.3	1.96996e-11	2.05308e-11
				15.4	1.95748e-11	2.02265e-11
				15.5	1.93719e-11	1.98879e-11
				15.6	1.9246e-11	1.95452e-11
				15.7	1.9076e-11	1.94354e-11
				15.8	1.88711e-11	1.91749e-11
				15.9	1.84783e-11	1.88448e-11
				16	1.82515e-11	1.85519e-11
				16.1	1.82436e-11	1.83516e-11
				16.2	1.82724e-11	1.80717e-11
				16.3	1.80649e-11	1.77318e-11
				16.4	1.79083e-11	1.73778e-11
				16.5	1.75174e-11	1.71264e-11
				16.6	1.7354e-11	1.68911e-11
				16.7	1.69089e-11	1.67695e-11
				16.8	1.6614e-11	1.65431e-11
				16.9	1.64106e-11	1.6308e-11
				17	1.60302e-11	1.59156e-11
				17.1	1.58345e-11	1.57083e-11
				17.2	1.53338e-11	1.55432e-11
				17.3	1.50485e-11	1.53145e-11
				17.4	1.46042e-11	1.51108e-11
				17.5	1.44617e-11	1.47691e-11
				17.6	1.43504e-11	1.43919e-11
				17.7	1.4181e-11	1.422e-11
				17.8	1.39491e-11	1.41231e-11
				17.9	1.36537e-11	1.43322e-11
				18	1.35532e-11	1.40823e-11
				18.1	1.33664e-11	1.3869e-11
				18.2	1.32113e-11	1.33728e-11
				18.3	1.29655e-11	1.30752e-11
				18.4	1.28124e-11	1.28048e-11
				18.5	1.25391e-11	1.26691e-11
				18.6	1.23068e-11	1.24961e-11
				18.7	1.2005e-11	1.21485e-11
				18.8	1.19171e-11	1.17543e-11
				18.9	1.18743e-11	1.1635e-11
				19	1.1835e-11	1.14814e-11
				19.1	1.17813e-11	1.13916e-11
				19.2	1.15842e-11	1.11992e-11
				19.3	1.1361e-11	1.13067e-11
				19.4	1.11106e-11	1.13164e-11
				19.5	1.09087e-11	1.10798e-11
				19.6	1.0675e-11	1.07299e-11
				19.7	1.05661e-11	1.04368e-11
				19.8	1.04365e-11	1.02499e-11
				19.9	1.03928e-11	1.01242e-11
				20	1.00761e-11	9.96981e-12
				20.1	9.89854e-12	9.72829e-12
				20.2	9.69441e-12	9.44031e-12
				20.3	9.47637e-12	9.28658e-12
				20.4	9.26951e-12	9.33763e-12
				20.5	9.03506e-12	9.19885e-12
				20.6	8.98126e-12	9.11445e-12
				20.7	8.75262e-12	8.81214e-12
				20.8	8.60609e-12	8.88107e-12
				20.9	8.43062e-12	8.81639e-12
				21	8.43202e-12	8.9693e-12
				21.1	8.4569e-12	8.78551e-12
				21.2	8.42427e-12	8.59358e-12
				21.3	8.17243e-12	8.41446e-12
				21.4	8.05575e-12	8.18394e-12
				21.5	7.989e-12	8.05594e-12
				21.6	7.90628e-12	7.82664e-12
				21.7	7.73162e-12	7.87023e-12
				21.8	7.73992e-12	7.80131e-12
				21.9	7.82202e-12	7.90916e-12
				22	7.63049e-12	7.74153e-12
				22.1	7.53159e-12	7.59181e-12
				22.2	7.30161e-12	7.38769e-12
				22.3	7.38987e-12	7.26509e-12
				22.4	7.16222e-12	7.12781e-12
				22.5	7.23776e-12	7.0502e-12
				22.6	7.14915e-12	7.05387e-12
				22.7	7.31003e-12	7.06671e-12
				22.8	7.221e-12	7.02581e-12
				22.9	7.22725e-12	6.92219e-12
				23	6.8463e-12	6.76171e-12
