# Supplementary material for: Sensory experience inversely regulates feedforward and feedback excitation-inhibition ratio in rodent visual cortex
Source: eLife. 2018 Oct 12;7:e38846. doi: 10.7554/eLife.38846 (PMC6224193; doi:10.7554/eLife.38846)
Supplement: Figure 7—source data 1. [file elife-38846-fig7-data1.xlsx]

## Sheet: Sheet1
Figure 7
7D			7E				7F				7G
Charge I	Charge E		Cell #	Pre DNQX	Post DNQX		Cell #	E/I CTR	E/I MD		Cell #	Rin CTR	Rin MD		Cp CTR	Cp MD
1.60296e-11	7.66983e-13		1	9.03016e-10	2.20206e-11		1	0.0910723	0.0547352		1	4.39921e+08	4.65658e+08		7.10055e-11	7.12389e-11
1.806e-11	8.97073e-13		2	8.22223e-10	3.61035e-12		2	0.0602737	0.0823117		2	4.78156e+08	8.29313e+08		8.00009e-11	5.94605e-11
1.85964e-11	7.35352e-13		3	1.0717e-09	1.07079e-11		3	0.0952832	0.0530634		3	6.71348e+08	5.86655e+08		6.09543e-11	6.49671e-11
1.87438e-11	9.33989e-13		4	8.38123e-10	1.25812e-11		4	0.0736997	0.0439436		4	8.2542e+08	4.57881e+08		5.74432e-11	7.89609e-11
2.20697e-11	9.12648e-13						5	0.0815578	0.0394773		5	8.01272e+08	9.02858e+08		5.35653e-11	5.30715e-11
2.79851e-11	1.24582e-12						6	0.0843505	0.0765154		6	3.83578e+08	8.16111e+08		7.58029e-11	5.72033e-11
2.90854e-11	1.41097e-12						7	0.0543891	0.0829824		7	4.68459e+08	3.64318e+08		7.67134e-11	5.41842e-11
							8	0.0901407	0.0716165		8	4.1163e+08	5.08478e+08		6.70532e-11	6.66818e-11
							9	0.116505	0.053744		9	4.92256e+08	5.09334e+08		5.76596e-11	6.42447e-11
							10	0.141058	0.08861		10	3.02084e+08	4.67013e+08		7.39275e-11	5.40681e-11
							11	0.0567352	0.0488261		11	4.98494e+08	6.29929e+08		6.62592e-11	5.78945e-11
							12	0.148746	0.0906635		12	5.16509e+08	6.6054e+08		7.30612e-11	4.9731e-11
