# Supplementary material for: Sensory experience inversely regulates feedforward and feedback excitation-inhibition ratio in rodent visual cortex
Source: eLife. 2018 Oct 12;7:e38846. doi: 10.7554/eLife.38846 (PMC6224193; doi:10.7554/eLife.38846)
Supplement: Figure 8—source data 1. [file elife-38846-fig8-data1.xlsx]

## Sheet: Sheet1
Figure 8
8B				8C				8D
Cell #	Amp. CTR	Amp. MD		Cell #	Frq. CTR	Frq. MD		Cell #	Tau CTR	Tau MD
1	13.0785	17.2583		1	58.7866	97.2983		1	0.9	0.6
2	17.8921	19.4895		2	88.7023	92.6558		2	1	0.7
3	12.7799	16.0372		3	82.7151	54.6909		3	1	0.9
4	14.7733	15.6428		4	57.8009	90.1326		4	0.8	0.8
5	15.3725	15.5481		5	62.526	81.4575		5	1	1
6	16.347	20.2824		6	70.884	126.146		6	1.1	0.6
7	13.1714	16.9452		7	54.6399	151.832		7	0.9	0.8
8	14.7674	17.8881		8	105.098	41.653		8	0.8	0.9
9	15.5659	15.3847		9	109.015	84.5504		9	0.9	0.9
10	17.954	15.389		10	113.178	85.2641		10	0.9	0.7
11	14.2841	21.6823		11	57.4863	85.4331		11	1.1	0.7
12	17.2445	15.7874		12	84.3167	87.6152		12	0.8	0.6
13	14.9636	17.9182		13	44.5302	46.4192		13	1	0.8
14	15.1686	15.5615		14	97.4028	45.4959		14	0.9	0.9
15	17.2809			15	104.672			15	0.8
16	15.1173			16	76.1907			16	1
17	17.2163			17	64.7927			17	0.9
18	16.8344			18	125.651			18	0.8
19	16.7179			19	58.7145			19	0.9
20	19.2037			20	122.331			20	0.7
